1 Comprehensive in virio structure probing analysis of the influenza A virus identifies a  
2 functional RNA structure involved in replication and segment interactions

3

4 Naoki Takizawa<sup>a#</sup>, Koichi Higashi<sup>b</sup>, Risa Karakida Kawaguchi<sup>c</sup>, Yasuhiro Gotoh<sup>d</sup>, Yutaka  
5 Suzuki<sup>e</sup>, Tetsuya Hayashi<sup>d</sup>, Ken Kurokawa<sup>b</sup>

6

7 <sup>a</sup>Laboratory of Virology, Institute of Microbial Chemistry (BIKAKEN), Tokyo, Japan

8 <sup>b</sup>Genome Evolution Laboratory, National Institute of Genetics, Mishima, Japan

9 <sup>c</sup>Artificial Intelligence Research Center, National Institute of Advanced Industrial

10 Science and Technology, Aomi, Koto-ku, Tokyo, Japan

11 <sup>d</sup>Department of Bacteriology, Faculty of Medical Sciences, Kyushu University, Fukuoka,

12 Japan

13 <sup>e</sup>Department of Computational Biology and Medical Sciences, Graduate School of

14 Frontier Sciences, The University of Tokyo, Kashiwa, Chiba, Japan

15

16 #Address correspondence to Naoki Takizawa, [takizawan@bikaken.or.jp](mailto:takizawan@bikaken.or.jp)

17

18

## 1 **Abstract**

2 The influenza A virus genome is segmented into eight viral RNAs (vRNA). Secondary  
3 structures on vRNA are thought to be involved in the viral proliferation process, such as  
4 intersegment interactions that are necessary for segment bundling. However, the  
5 functional RNA structure on vRNA is not well known because the secondary structure of  
6 vRNA in virion was partially unwound by binding viral non-specific RNA binding  
7 proteins in a sequence-independent manner. Here, we establish the global map of the  
8 vRNA secondary structure in virion using the combination of dimethyl sulfate (DMS)-  
9 seq and selective 2'-hydroxyl acylation analyzed by primer extension (SHAPE)-seq. By  
10 integrating DMS-seq and SHAPE-seq analyses with robust statistical analysis, we  
11 inferred quite a few bases paired regions including a pseudoknot structure on segment 5.  
12 Notably, when cells were infected with the recombinant virus which had mutations in the  
13 pseudoknot structure, the impairment of replication and packaging was observed on the  
14 other specific segment. Moreover, we analyzed the comprehensive intersegment RNA  
15 interactions in virion by ligation of interacting RNA followed by high-throughput  
16 sequencing (LIGR-seq). Our LIGR-seq analysis revealed that the intersegment  
17 interactions of the specific segment became less frequent and rearranged in the  
18 recombinant virus in concordance with the strength of genome packaging impairment.  
19 Our data provide evidence that the functional RNA structure motif on the influenza A  
20 virus genome can affect the efficiency of replication and segment bundling through the

1 segment interactions.

2

## 1 **Introduction**

2 The influenza A virus (IAV) genome consists of eight single-stranded negative-sense  
3 RNA segments (vRNA). One copy of each segment is packaged together into a single  
4 virus particle, and eight segments are organized in a conserved ‘7+1’ configuration in the  
5 virus particle [1,2]. Segment reassortment is one of the driving forces for IAV evolution.  
6 Genetic reassortment between the human IAV and the avian/animal IAV can lead to the  
7 emergence of a new subtype of IAV, a candidate for a pandemic influenza strain. Each  
8 genome segment forms the viral ribonucleoprotein (vRNP) with the viral RNA  
9 polymerase and nucleoprotein (NP), a single-stranded RNA binding viral protein. In the  
10 previous study, the vRNPs in viral particles are revealed to form a double-helical structure  
11 with the polymerase at one end and a short loop at the other [3].

12 Previous studies have examined motif sequences required for efficient genome  
13 packaging and bundling [4]. The signal sequences for efficient genome packaging and  
14 bundling were initially found to be located in the coding regions at both ends of each  
15 segment, but they have also been found in the middle of coding regions. Mutations and  
16 deletions of some signal sequences resulted in impairment in the bundling of eight  
17 segments [5–10], and each segment was shown to have different importance for the viral  
18 genome bundling [11], suggesting that the bundling of the segmented genome is a  
19 hierarchical process. While the function of these signal sequences remains unknown, it is  
20 hypothesized to be involved in intersegment interactions for segment bundling. Regions

1 responsible for the interactions between vRNAs have been identified *in vitro*, suggesting  
2 the existence of specific intersegment interaction networks necessary for genome  
3 packaging [12–15]. Direct contacts between the vRNPs have also been observed by  
4 electron tomographic analyses [16,17]. Recent studies using a comprehensive high-  
5 throughput sequencing (HTS) approach demonstrated that a redundant and complex  
6 network of intersegment interactions found in the virion is essential for bundling the eight  
7 segments [18,19]. As such, intersegment interactions are one of the important key factors  
8 to control precise genome bundling.

9           To form and regulate higher-order interactions including intersegment  
10 interactions, the importance of the RNA secondary structures has been widely recognized.  
11 In many RNA viruses, specific regions of the viral RNA genomes also act as cis-acting  
12 regulatory elements that mediate the virus propagation. These cis-acting RNA elements  
13 often form highly specialized structural motifs such as stem-loops or pseudoknots [20].  
14 In IAV, the RNA structures at the promoter region, located at the 5' and 3' termini of the  
15 vRNA and their reformation at the promoter in transcription step, are elucidated by crystal  
16 structure and cryo-EM analyses [21–23]. The comprehensive analysis of specialized  
17 structural motifs coded on the IAV genome RNA other than promoter region was carried  
18 out by the RNA secondary structure predictions, identifying the conservation and  
19 enrichment of stem-loop structures on the IAV genome [24,25]. Furthermore, the  
20 mutations that disrupt a predicted stem-loop and pseudoknot structure have been shown

1 to reduce virus propagation [24–27]. Gavazzi et al. identified an *in vitro* direct interaction  
2 between segments 2 and 8 of an H5N2 avian IAV strain. They found that these two regions  
3 involved in the intersegment interaction may form stem-loop structures that can initiate  
4 the intersegment interaction by forming a kissing-loop complex [13]. These findings  
5 hypothesized that specialized structural motifs on the IAV genome RNA mediate  
6 intersegment interaction networks.

7           However, the fluctuation of vRNA structure in virion due to binding NP in a  
8 sequence-independent manner makes it hard to reveal the precise vRNA structure through  
9 *in silico* study. Recent studies by cross-linking immunoprecipitation (CLIP) analyses  
10 have revealed that NP does not bind vRNA uniformly, indicating that the secondary  
11 structures of vRNAs are partially unwound by binding NP. For that reason, some specific  
12 regions of the vRNP can form unpredictable secondary structures *in silico* [28,29].  
13 Dadonaite et al. revealed the secondary structures of the IAV genome in the virion using  
14 selective 2'-hydroxyl acylation analyzed by primer extension and mutational profiling  
15 (SHAPE-MaP). Their SHAPE-MaP profiles revealed that some vRNA secondary  
16 structures remain in the context of vRNP [19].

17           The comparative analysis of different HTS approaches showed that each HTS  
18 approach possesses the own detection bias for base reactivity [30]. Thus, to further  
19 understand the function of vRNA secondary structure, comprehensive and high-  
20 resolution information on the secondary structures of the IAV genome in virion needs to

1 be created. In this study, we revealed the secondary structures of the IAV genome in the  
2 virion using multiple HTS technology and bioinformatics. We obtained a robust  
3 conformational map by combining two high-throughput and massive-scale sequencing  
4 techniques; dimethyl sulfate (DMS)-seq [31–33] and SHAPE-seq [34,35], and multiple  
5 bioinformatical tools for calculating SHAPE reactivity; BUMHMM [36] and reactIDR  
6 [37]. DMS and NAI can modify different moieties of a single-stranded RNA [38],  
7 resulting in a different detectability depending on the sequence content. As a result, we  
8 identified a specialized structural motif on the vRNP and showed that the unwinding of  
9 this structural motif resulted in the impairment of replication. We further revealed the  
10 global intra- and intersegment interactions of the recombinant virus that had mutations in  
11 the structural motif region using ligation of interacting RNA followed by high-throughput  
12 sequencing (LIGR-seq) [39] and demonstrated that a part of intersegment interactions  
13 detected between multiple segments was rearranged in the recombinant virus. Our results  
14 suggest that the structural motif formed on vRNP is required for replication and segment  
15 interactions to preserve the genomic structures of the IAV.

## 1 **Results**

### 2 **Identification of pseudoknot structure formed in the vRNP by high-throughput** 3 **structure probing methods**

4 To reveal the vRNA secondary structures by binding the viral proteins, we performed  
5 DMS-seq and SHAPE-seq for IAV genome RNA in three different conditions; the vRNA,  
6 vRNP, and virion. These methods are aimed to detect the RNA regions that are more  
7 accessible and likely to be attacked by the reagents. Thus, we can infer single-stranded  
8 and double-stranded regions at a single base resolution according to the reactivity scores.  
9 We utilized both DMS-seq and SHAPE-seq to uncover the whole landscape of the  
10 secondary structures of vRNA, which was highly complex with the viral proteins.

11 We carried out duplicate DMS-seq and SHAPE-seq experiments. The  
12 coverages were enough to calculate the reactivities except for the 3' end of segments  
13 (Figure S1A). Reproducibility was evaluated by the drop-off rate of reverse transcriptase.  
14 The coefficient of determination of each duplicate experiment ranged from 0.26 to 0.93  
15 (Figure S1B). To calculate a reliable score from these samples, we utilized robust  
16 statistical analyses. The probabilities of modifications for all nucleotides were calculated  
17 from the large-scale sequencing data using BUMHMM [36] and reactIDR [37]. reactIDR  
18 and BUMHMM output normalized probability that is an index of reactivity. The overall  
19 tendency of RNA structure was assessed for each segment using the violin plot of  
20 probabilities calculated by reactIDR (Figure 1A). As a result, the median of probability



1 from the virion and the vRNP labeled with DMS was higher than that from the DMS-  
2 labeled vRNA (P-value  $< 2.2 \times 10^{-16}$  by Kruskal-Wallis test), and those labeled with NAI  
3 was lower than that from the NAI-labeled vRNA in SHAPE-seq (P-value  $< 2.2 \times 10^{-16}$  by  
4 Kruskal-Wallis test) (Figure 1A). Next, we compared probabilities of high-NP binding  
5 regions identified PAR-CLIP analysis [29] with that of the other regions (Tables S1 and  
6 S2). The probability of high-NP binding regions in vRNA was lower than that of the other  
7 regions. However, the probability of high-NP binding regions in vRNP and virion were  
8 higher than or comparable with those of the other regions. These results suggest that the  
9 overall secondary structure of vRNA is likely to be dissolved by forming in the vRNP.

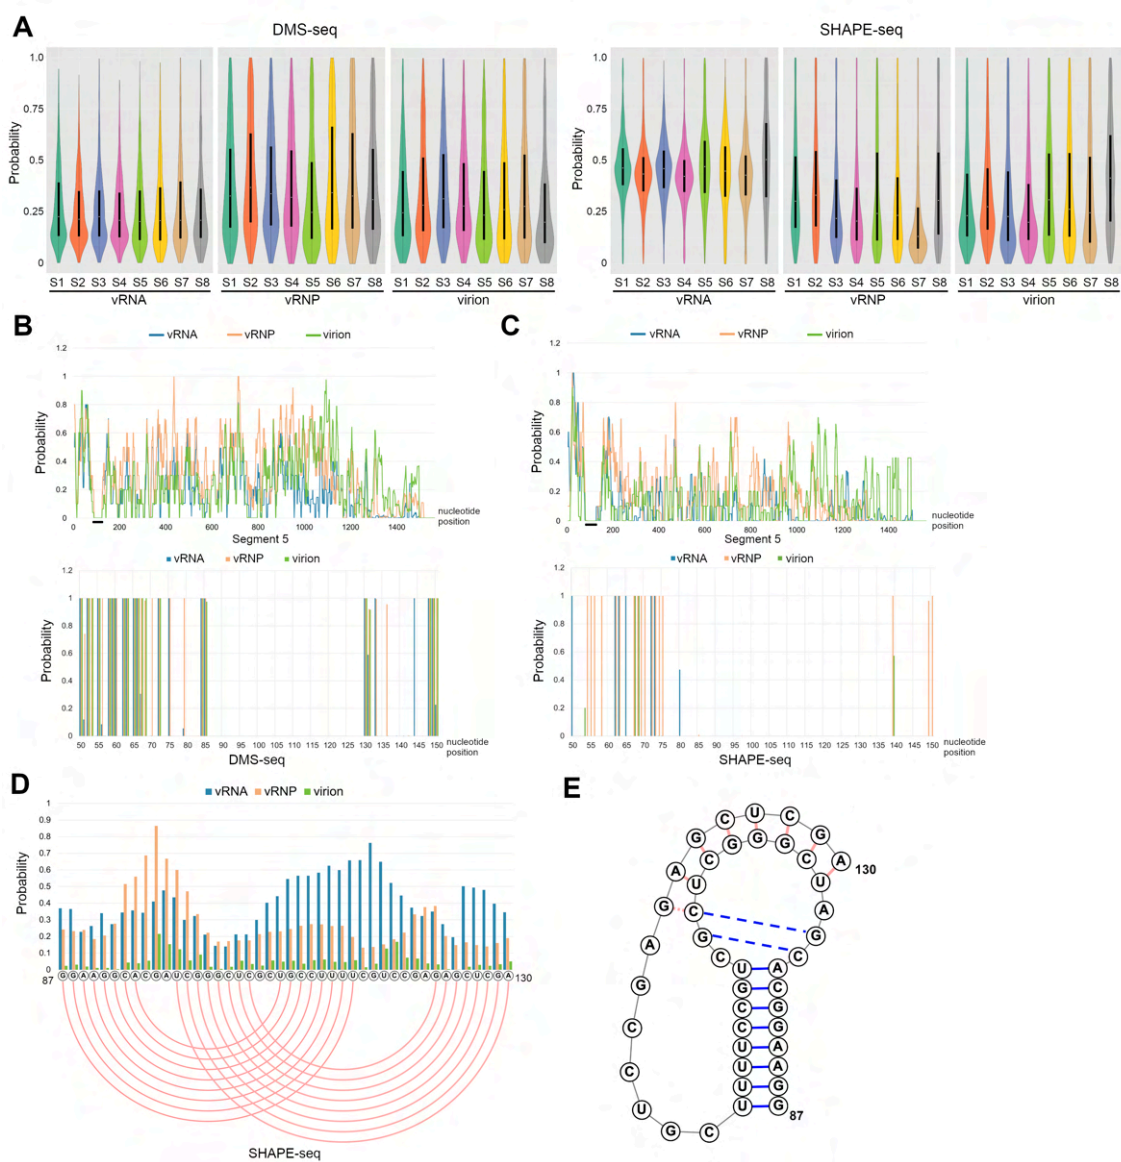

1  
 2 **Figure 1. A pseudoknot structure at nucleotide positions 87–130 of segment 5 in**  
 3 **the virion.** (A) Distribution of probabilities from DMS-seq and SHAPE-seq of the  
 4 vRNA, vRNP, and purified virion from the allantoic fluid. Probabilities from DMS-  
 5 seq and SHAPE-seq were calculated by reactIDR, and the scores of each segment were  
 6 shown by violin plot. (B and C) The probabilities of segment 5 in the vRNA, vRNP,  
 7 and virion. Probabilities were calculated by BUMHMM, and a 10-nt moving average

1 of the probability of segment 5 from DMS-seq (B) and SHAPE-seq (C) was shown  
2 (upper panels). The lower panels show the probabilities of a specific region indicated  
3 by a black line in the upper panels. vRNA sequence is numbered from 5' to 3'. (D) The  
4 probabilities and predicted base pairs at nucleotide positions 87 – 130 of segment 5.  
5 The probabilities of each nucleotide from SHAPE-seq were calculated by reactIDR.  
6 Pink lines indicate predicted base pairs in the pseudoknot structure. (E) The schematic  
7 representation of the pseudoknot structure at nucleotide positions 87 – 130 of segment  
8 5.

9  
10 We next examined the local RNA secondary structure on vRNP. Base-pairing  
11 probabilities from DMS-seq and SHAPE-seq were analyzed by Superfold [40].  
12 Secondary structures on segments 1, 3, 4, and 8 in virion previously identified by SHAPE-  
13 MaP analysis [19] were also identified by our DMS-seq and SHAPE-seq (Figure S2A).  
14 To identify other structured regions on vRNP, the probabilities were re-calculated by  
15 BUMHMM, which outputs the probabilities of modifications of each nucleotide  
16 displaying an almost binary output. The probability plot of each segment was shown in  
17 Figures 1B, 1C, and S3. We found that the less reactive region for both NAI and DMS  
18 was found in vRNA at nucleotide positions 87 – 130 of segment 5 (Figures 1B and 1C).  
19 This less reactive region was consistently observed in the vRNP and virion, suggesting  
20 that the secondary structure of this region is not changed by the vRNP formation.

1 Interestingly, this region was categorized in the low-NP-binding regions [29] and  
2 predicted to form a pseudoknot structure in the previous studies [24,29]. The base-pairing  
3 probability of nucleotide positions 87 – 130 of segment 5 showed that this region could  
4 form complex RNA structures (Figure S2B). We tried to determine the RNA structure at  
5 nucleotide positions 87 – 130 of segment 5 by RNA structure prediction and SHAPE-seq  
6 data. We analyzed the RNA structure of nucleotide positions 87 – 130 of segment 5 only  
7 from SHAPE-seq data because DMS labeled only adenine and cytosine residues, and thus  
8 the resolution of DMS-seq was lower than that of SHAPE-seq in the region. Figures 1D  
9 and 1E show a predicted secondary structure by IPknot [41] for the 87 – 130 nucleotides  
10 of segment 5 and the probabilities of the NAI-labeled vRNA, vRNP, and virion at each  
11 nucleotide position calculated by reactIDR. The location of predicted pseudoknot  
12 structure by IPknot was inconsistent with SHAPE-MaP data [19]. However, our  
13 reanalysis from the previous SHAPE-MaP suggests that nucleotide positions 87 – 130  
14 form pseudoknot structure predicted by IPknot (Figure S4). The probabilities of the NAI-  
15 labeled vRNP and virion at nucleotide positions 87 – 130 supported the stem and loop  
16 structure predicted by IPknot while the probability in the vRNA only weakly supported  
17 the stem and loop structure, suggesting that the pseudoknot structure at nucleotide  
18 positions 83 – 130 is more frequently formed in the vRNP and virion. Taken together, our  
19 comprehensive RNA structural analysis indicated the formation of the particular  
20 pseudoknot structure on segment 5 vRNP.

1

## 2 **The RNA structure at nucleotide positions 87 – 130 of segment 5 in mutant viruses**

3           To investigate the role of the pseudoknot structure for virus propagation, we  
4 constructed recombinant viruses where multiple mutations were introduced; one is to  
5 disrupt the pseudoknot structure (referred as 87mut, hereafter) and another is to  
6 reconstruct the base pairs disrupted by the mutations in 87mut (referred as 87rec,  
7 hereafter) (Figure 2A). The 87mut virus had three mutations, G96A, C126U, and G129A,  
8 that did not induce amino acid changes of NP coded on segment 5, and the 87rec virus  
9 had additional three mutations, C98A, G102A, and C105U, that were thought to revert  
10 base pairs disrupted by mutations in 87mut virus and that also did not induce amino acid  
11 changes of NP (Figure 2A). Among the three mutations within the pseudoknot region,  
12 G96 is located within the loop in our predicted pseudoknot structure but within the stem  
13 region in a slightly different pseudoknot structure predicted in a previous study [24]. We  
14 first analyzed whether these mutations affected the virus propagation. As a result, the  
15 propagation of the 87mut virus was impaired compared with that of the wild type virus,  
16 even though all three mutations did not change any amino acid residues (Figure 2B). The  
17 propagation of the 87rec virus was comparable with that of the wild type virus (Figure  
18 2B). These results suggest that the pseudoknot structure in segment 5 plays an important  
19 role in virus propagation.

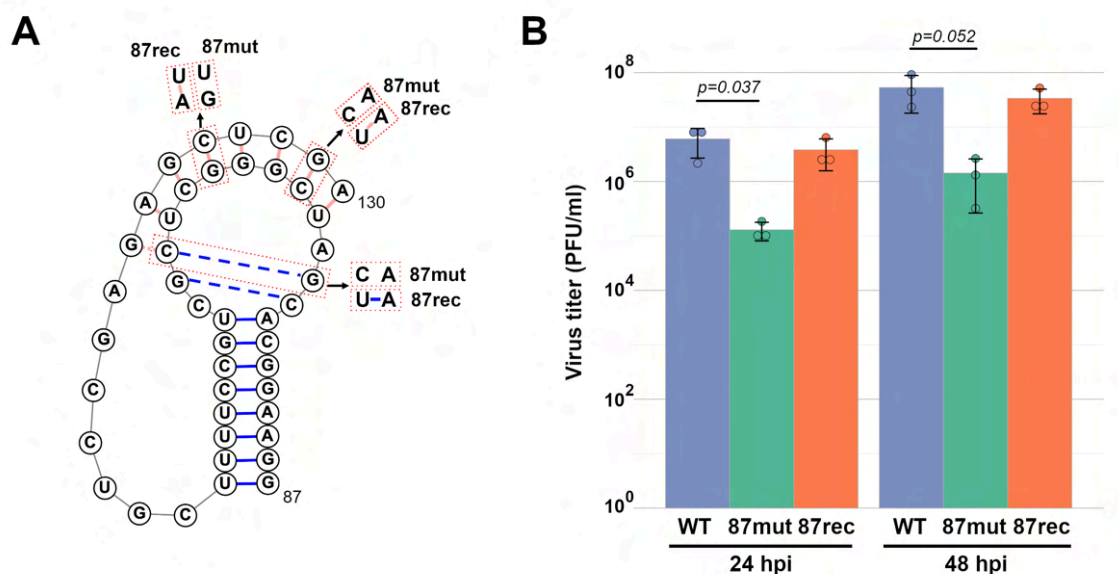

1  
2 **Figure 2. Impairment of propagation of recombinant virus which had mutations**  
3 **in the pseudoknot structure.** (A) Mutations in the 87mut and 87rec viruses. The  
4 orange boxes indicate the mutated base pairs in the 87mut and 87rec viruses. (B) Virus  
5 propagation of the 87mut and 87rec viruses. MDCK cells were infected with the wild  
6 type, 87mut, or 87rec virus at an MOI of 0.01. The supernatant was collected at  
7 indicated hours post infection (hpi), and the virus titer was determined by a plaque  
8 assay. The graph indicates average values with standard deviations from three  
9 independent experiments. The circles indicate the titer of each experiment. P-values  
10 were calculated by the Dunnett's multiple comparison test.

11  
12 Next, we examined the structural differences using SHAPE-seq for the 87mut  
13 and 87rec viruses. The wild type, 87mut, and 87rec viruses were purified from infected

1 cell culture supernatant, and SHAPE-seq was performed. The coverages of duplicate  
2 experiments were shown in Figure S5A, and the plots of drop-off rate of duplicate  
3 experiments and the coefficient of determination were shown in Figure S5B. The  
4 coverages were enough to calculate the reactivities except for the 3' end of segments and  
5 the coefficient of determination of each duplicate experiment ranged from 0.40 to 0.94.  
6 The probabilities from duplicate experiments were calculated by reactIDR. First, to  
7 confirm the formation of the pseudoknot structure in the wild type virus from different  
8 virus sources, probabilities at nucleotide positions 87 – 130 of segment 5 in the wild type  
9 virus from cell culture supernatant were compared with those from allantoic fluid. The  
10 pattern of probabilities in the wild type virus from cell culture supernatant fits the  
11 predicted pseudoknot structure, even though the background probabilities were higher  
12 than that from allantoic fluid (Figures 1C and 3A). The total probabilities between virus  
13 from cell culture supernatant and allantoic fluid were correlated (Figure S6). These results  
14 suggest that the secondary structure at nucleotide positions 87 – 130 of segment 5 from  
15 different virus sources is almost identical.

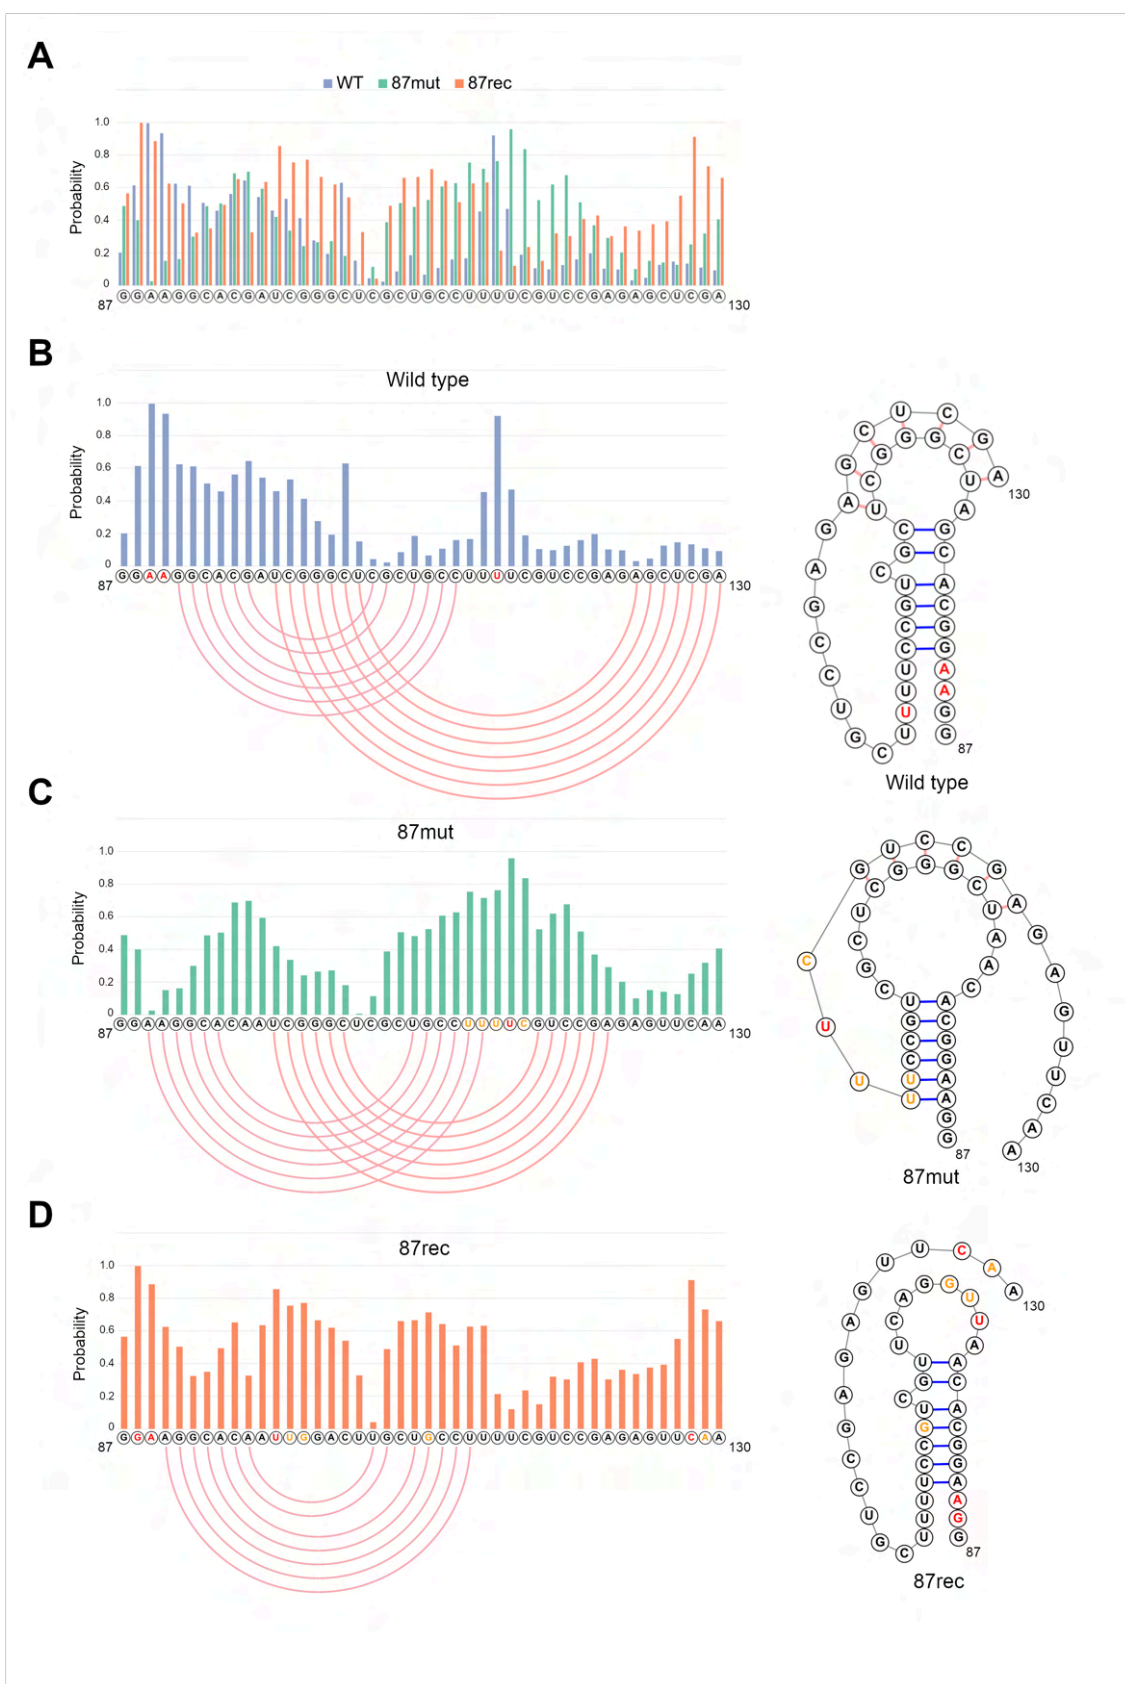



1        **Figure 3. Rearrangement of the RNA structure at nucleotide positions 87 – 130 of**  
2        **segment 5 in the 87mut and 87rec viruses.** (A) Probabilities at nucleotide positions  
3        87 – 130 of segment 5 in the wild type, 87mut, and 87rec viruses. Probabilities from  
4        SHAPE-seq of the wild type, 87mut, and 87rec viruses were calculated by reactIDR.  
5        (B, C, and D) Probabilities and predicted secondary structure at nucleotide positions  
6        87 – 130 of segment 5. Probabilities at nucleotide positions 87 – 130 of segment 5 in  
7        the wild type (B), 87mut (C), or 87rec virus (D) are shown, and the secondary structure  
8        was predicted by IPknot or MXfold2. Pink lines indicate the predicted base pairs. Red  
9        letters and yellow letters indicate probabilities more than 0.85 and 0.70, respectively.

10

11                The secondary structure at nucleotide positions 87 – 130 in the 87mut virus was  
12        predicted by IPknot. In the 87rec virus, a pseudoknot structure was not predicted at  
13        nucleotide positions 87 – 130 by IPknot. Thus, the secondary structure at this region was  
14        predicted by MXfold2 [42]. The probability at nucleotide positions 87 – 130 in the wild  
15        type, 87mut, and 87rec viruses was shown in Figure 3A. The RNA structure predicted by  
16        IPknot (wild type and 87mut viruses) or MXfold2 (87rec virus) and the probabilities of  
17        each nucleotide were shown in Figure 3B-D, respectively. In nucleotide positions 87 –  
18        130 of 87mut virus, a pseudoknot structure was also predicted by IPknot. However, the  
19        base pairs were substantially reorganized compared with that of the wild type virus. The  
20        probability of this region in the 87mut virus corresponded to the predicted pseudoknot

1 structure (Figure 3C). In the 87rec virus, a pseudoknot structure was not predicted in the  
2 region by IPknot, while a stem-loop structure was predicted by MXfold2. The pattern of  
3 probability at nucleotide positions 87 – 130 of 87rec virus also indicated that base pairs  
4 were not formed in the loop region (Figure 3D). These results suggest that the RNA  
5 structure of nucleotide positions 87 – 130 is substantially reorganized in 87mut virus and  
6 partially reconstituted in 87rec virus.

7

## 8 **Impairment of viral genome replication by mutations in pseudoknot structure in** 9 **segment 5**

10 To assess in which step at which virus propagation was impaired in the 87mut virus, we  
11 determined the amounts of the vRNA segment in the cells infected with the mutant viruses.  
12 The relative amount of vRNA in the cells infected with the 87mut virus was decreased at  
13 8 hours post-infection (hpi) and 16 hpi but not statistically significant, while that with the  
14 87rec virus was comparable with that with the wild type virus (Figure 4A). To analyze  
15 the replication efficiency of each segment, the ratio of each segment at 8 and 16 hpi was  
16 determined by the normalization by the amount of segment 5 (Figure 4B). The relative  
17 amount of segment 3 in cells infected with the 87mut virus at 8 hpi was decreased, while  
18 that with the 87rec virus was comparable with that with wild type virus. The relative  
19 amount of segments in cells infected with mutant viruses at 16 hpi followed the same  
20 trend as that at 8 hpi. These results suggest that the mutations in the pseudoknot region

- 1 affect the replication of vRNAs and the replication ratio of segments, especially segment
- 2 3.

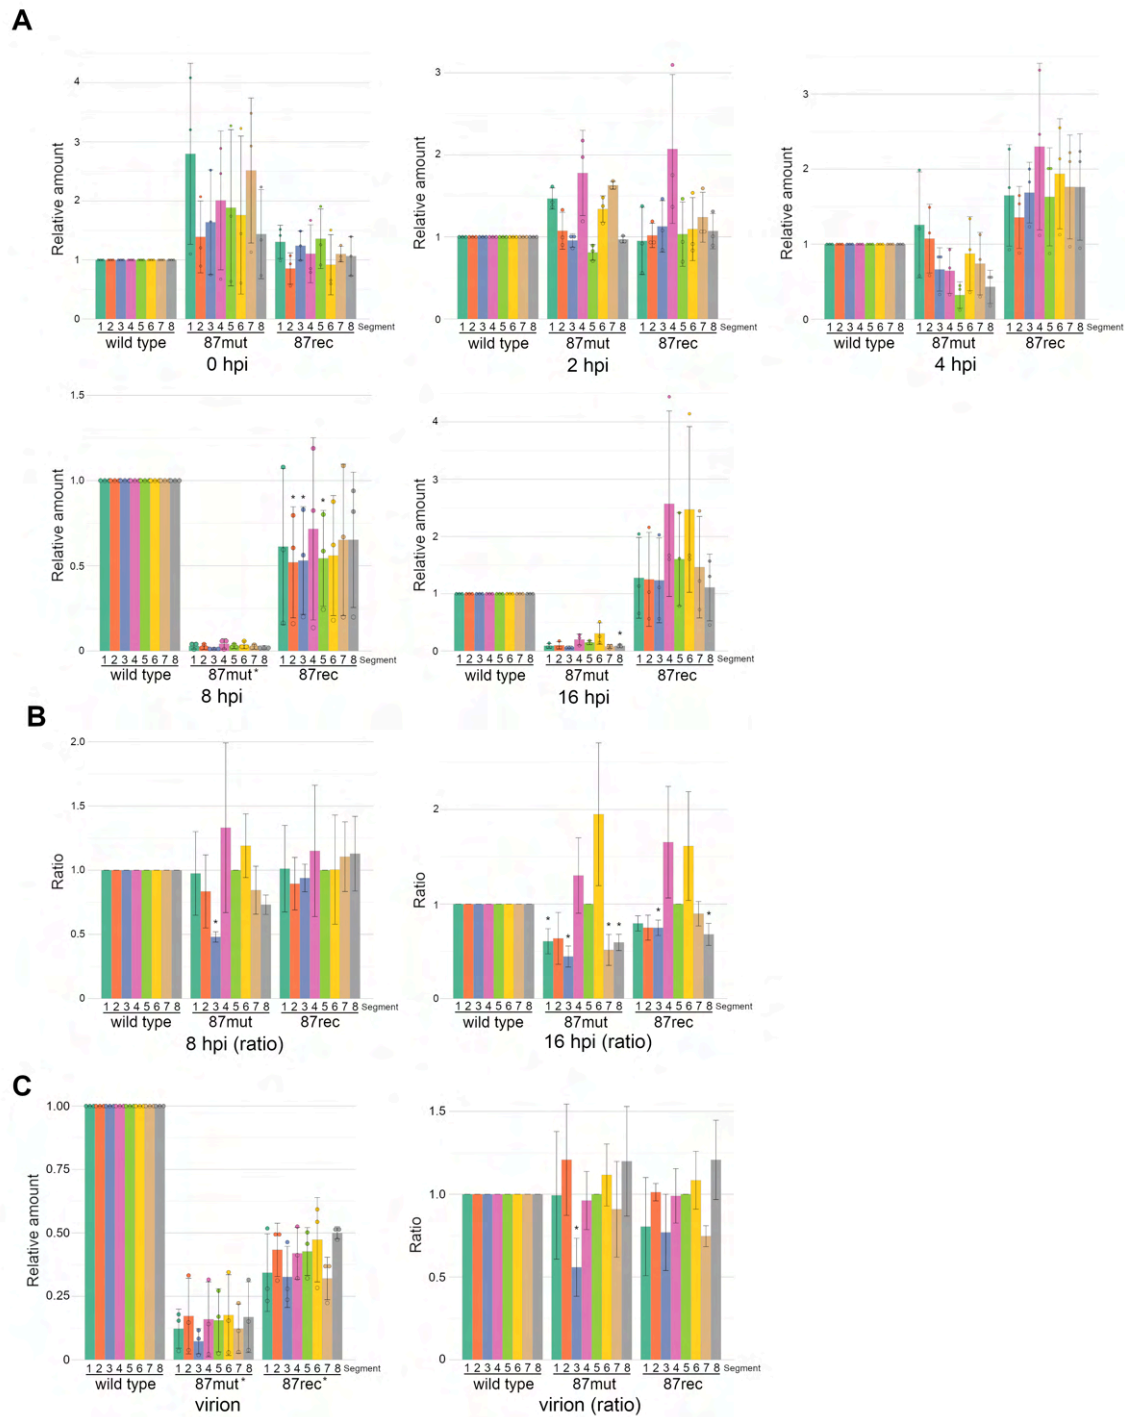

3

4 **Figure 4. Impairment of viral genome replication and packaging of segment 3 in**

1 **the 87mut virus.** (A) Relative vRNA amount in the infected cells. The amount of each  
2 segment was determined by RT-qPCR, and the relative amount was calculated by  
3 normalization to the wild type virus. The graph indicates average values with standard  
4 deviations from three independent experiments. The circles indicate the relative  
5 amount of segments in each experiment. P-values were calculated by the Dunnett's  
6 multiple comparison test, and an asterisk indicates P-values less than 0.05. An asterisk  
7 beside 87mut at 8 hpi result means P-values of all segments less than 0.05. (B) The  
8 ratio of segments in infected cells. The relative vRNA amount at 8 hpi and 16 hpi in  
9 (A) was double-normalized by the amount of segment 5 to calculate the ratio of  
10 segments in infected cells. P-values were calculated by the Dunnett's multiple  
11 comparison test, and an asterisk indicates P-values less than 0.05. (C) Relative vRNA  
12 amount and ratio of segments in the virion. The amount of each segment was  
13 determined by RT-qPCR, and the relative vRNA amount was calculated by  
14 normalization to the wild type virus (left graph). The graph indicates average values  
15 with standard deviations from three independent experiments. The circles indicate the  
16 relative amount of segments in each experiment. The relative vRNA amount was  
17 double-normalized by segment 5 to calculate the ratio of segments in virion (right  
18 graph). P-values were calculated by the Dunnett's multiple comparison test, and an  
19 asterisk indicates P-values less than 0.05. Asterisks beside 87mut and 87rec mean P-  
20 values of all segments less than 0.05.

1

2           Furthermore, to analyze the vRNA packaging efficiency of the mutant virus,  
3 we determined the amount of vRNAs and the ratio of segments in the virion.  
4 Consequently, the amount of vRNAs and the relative amounts of segment 3 in the 87mut  
5 virus were significantly decreased than that of the wild type virus (Figure 4C). These  
6 results suggest that the packaging of segment 3 was impaired depended on the amount  
7 and ratio of segments in infected cells. Moreover, we performed a FACS analysis of the  
8 viral proteins in the cells infected with the mutant virus to quantify the fraction of semi-  
9 infectious particles that represented the segment bundling function [43]. The infected  
10 cells were stained with the combination of NP and M1, HA and NP, and HA and M1,  
11 respectively. In cells infected with the mutant viruses, the ratios of the cells expressing  
12 NP and M1, HA and NP, and HA and M1 were comparable to that of the cells infected  
13 with the wild type virus (Figure S7). This result indicates that the co-packaging efficiency  
14 of these segments is not altered in mutant viruses.

15

## 16 **Intersegment structures supported by RNA interactions**

17 We showed that the packaging of segment 3 in the 87mut virus was significantly  
18 decreased, and it has been provided evidence that intersegment RNA interactions drive  
19 segment bundling. Thus, we next analyzed comprehensive intersegment interactions in the  
20 wild type and the mutant viruses. To identify global genome RNA interactions in the

1 virion, we optimized a LIGR-seq, which cross-links RNAs that form base pairs between  
2 each other, for the virion [39] (Figure S8). The total number of paired-end reads mapped  
3 at intrasegment and at intersegment in each LIGR-seq were listed in Table S3. First, the  
4 consistency of intrasegment interaction detection is investigated using our modified  
5 LIGR-seq. To quantify the interaction frequencies, the contact map was normalized using  
6 the iterative method that was employed in Hi-C data analysis [44]. The normalized count  
7 in each 100 nt bin was referred to as the contact score. To assess a bias of selection of the  
8 cross-linked RNA, we performed LIGR-seq experiments with or without RNaseR  
9 treatment. Background intrasegment signals were reduced in the RNaseR-treated samples,  
10 and the intersegment signal was enhanced (Figure S9). To identify the reliable  
11 intersegment interactions, the contact scores from the duplicate experiment were adjusted  
12 using the irreproducible discovery rate (IDR) [45]. We determined the threshold to the  
13 IDR score of the 100th intersegment interaction (Figure S10). Regions with high IDR  
14 scores were mainly intrasegment interaction regions, but reproducible intersegment  
15 interaction regions were identified by the IDR analysis (Figure S10). We constructed a  
16 contact map of intersegment and intrasegment interactions and an interaction map of  
17 identified 100 intersegment interactions (Figure 5). As a result, the interaction of the 3'-  
18 and 5'- end of the vRNA was captured (Figure 5A), and intersegment interactions formed  
19 redundant and complex interaction networks (Figure 5B).

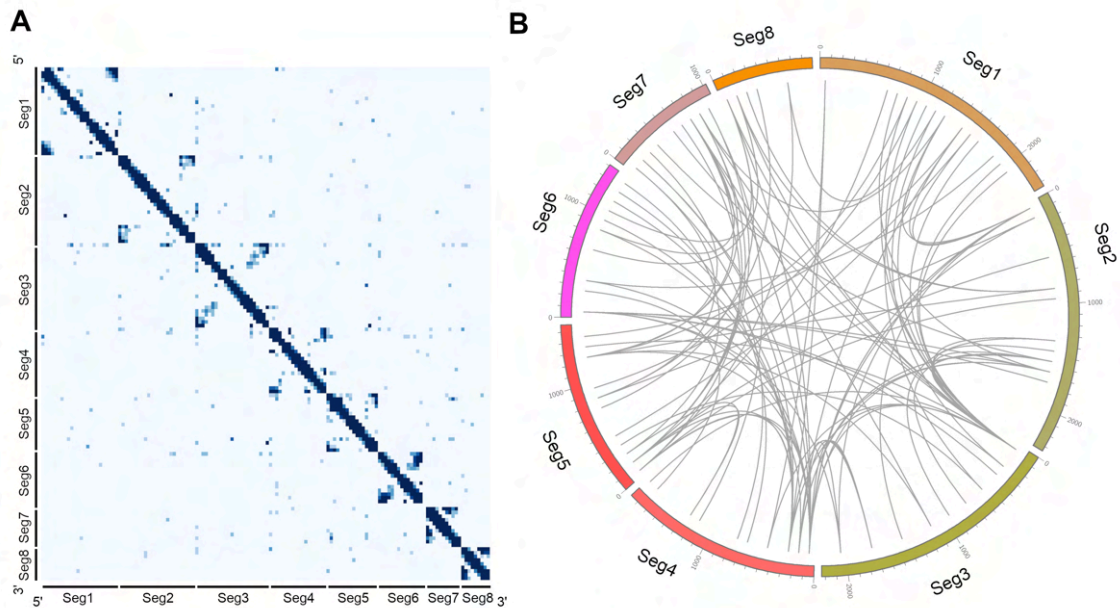

**Figure 5. Intra- and intersegment interaction map of segment RNAs.** (A) Contact

map of the wild type virus by duplicate LIGR-seq. Intra-segment and intersegment

interactions were identified by IDR score (IDR score > 0.01, containing 100

intersegment interactions) from duplicate LIGR-seq data, and contact maps were

constructed. The light and shade of colors in each bin represent low and high

normalized contact scores. Bin: 100 bp. (B) The intersegment interaction map in the

purified virion. Intersegment interactions with IDR scores from the top to the 100th

were extracted. Each line indicates the intersegment interaction which results from

LIGR-seq.

Moreover, to confirm the reproducibility of the intersegment interactions

captured by LIGR-seq, we compared our global map of intersegment interactions with

1 those previously identified by sequencing of psoralen-crosslinked, ligated, and selected  
2 hybrids (SPLASH) [19]. The global map of intersegment interactions was reported in  
3 PR8 and WSN strain by SPLASH [19] and WSN strain by dual cross-linking,  
4 immunoprecipitation, and proximity ligation [18]. We carried out LIGR-seq analysis on  
5 the PR8 strain, and intersegment interaction analysis by SPLASH suggested that the  
6 prevalence of the intersegment interactions was prone to change between PR8 and WSN  
7 strain [19]. Thus, we compared the 100 intersegment interactions of LIGR-seq and the  
8 intersegment interactions with the top to the 100th read score of SPLASH analysis.  
9 Intersegment interaction maps from our modified LIGR-seq and SPLASH are shown in  
10 Figure S11. We defined the intersegment interactions within 200 nt of each other as  
11 overlapped intersegment interactions because vRNA was digested into a fragment that  
12 was approximately 300 nt long in our library preparation for large-scale sequencing.  
13 Twenty-six intersegment interactions (26% of the 100 interactions detected by LIGR-seq)  
14 were identified in both LIGR-seq and SPLASH, suggesting that intersegment interactions  
15 captured by LIGR-seq are also captured by a different method, partially.

16

### 17 **Rearrangement of the intersegment interaction of segment 3 in the 87mut virus**

18 To analyze whether intersegment interactions were rearranged in the mutant viruses, we  
19 further performed LIGR-seq for the 87mut and 87rec viruses and obtained the  
20 intersegment interaction map. First, we analyzed the intersegment interactions identified



1 in both the wild type and the mutant viruses. As a result, 20 interactions in the 87mut  
2 virus and 37 interactions in the 87rec virus were overlapped with the interactions in the  
3 wild type virus (Figure 6A, red line). The interactions between segments 3, 4, 6, and 8  
4 and other segments identified both in the wild type and the 87mut virus were few, while  
5 a novel interaction was observed in the 87mut virus (Figures 6A and S12A). The bias to  
6 specific segments was not observed in the interactions identified both in the wild type and  
7 the 87rec virus (Figure 6A and S12B). At the nucleotide positions 1 – 200 of segment 5  
8 where mutations were introduced in the mutant viruses, the interactions between  
9 segments 5 and 4 were not maintained in the 87mut virus (Figure S12C). The interactions  
10 between nucleotide positions 1 – 100 of segment 5 and segments 4 and 7 were maintained  
11 in the 87rec virus, while those between segment 5 and segments 1 and 2 were not  
12 maintained (Figure S12C). These results suggest that the intersegment interactions were  
13 partially rearranged in the 87mut virus and were maintained in the 87rec virus compared  
14 with that in the 87mut virus.

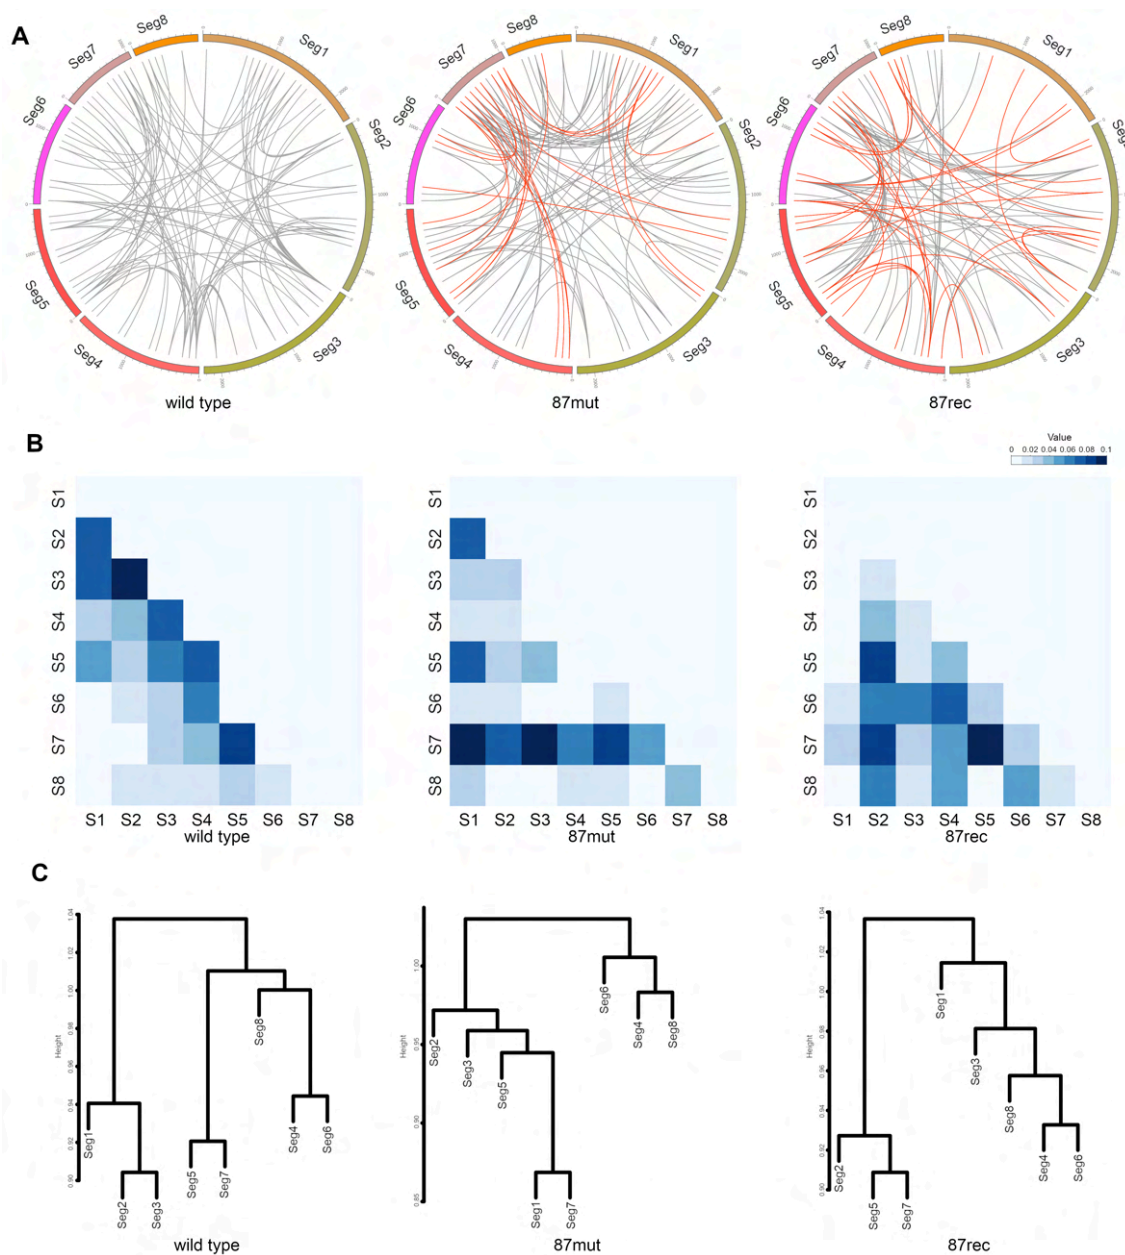

1

2 **Figure 6. Reconstitution of the intersegment interactions in the 87mut virus. (A)**

3 Intersegment interactions in the wild type, 87mut, and 87rec viruses. Intersegment

4 interaction maps of the wild type, 87mut, and 87rec viruses were constructed from

5 LIGR-seq. Intersegment interactions identified in both the wild type and the 87mut

6 virus or the 87rec virus within a limit of 200 nt have been indicated by red lines. (B)

1 Intensity maps of the intersegment interactions in the wild type and the mutant viruses.  
2 Total contact scores of all the two-segment combinations from LIGR-seq were  
3 calculated, and the contact scores were normalized by total contact scores of all  
4 intersegment interactions. The light and shade of colors in each bin represent low and  
5 high normalized contact scores from 0 to 0.1. (C) Cluster analysis of intersegment  
6 interactions from LIGR-seq. Cluster analysis was performed using the reciprocal  
7 number of contact scores of all the two-segment combinations from LIGR-seq.

8  
9 Next, we assessed the intensity of the intersegment interactions in the wild type  
10 and the mutant viruses. To analyze the intensity of intersegment interactions, the ratio of  
11 the contact scores for all the interactions in each intersegment combination to the total  
12 contact scores in all the intersegment interactions was summarized in Figure 6B. First,  
13 we focus on the intersegment interactions between segment 3 and other segments because  
14 the replication of segment 3 was reduced in cells infected with the 87mut virus. The  
15 overall contact scores between segments 3 and other segments except for segment 7 were  
16 reduced in the 87mut virus, while that of segment 7 was enhanced. The overall contact  
17 scores between segment 3 and segments 6, 7, and 8 were maintained, while those between  
18 segment 3 and segments 1, 2, 4, 5 were substantially reduced in the 87rec virus. These  
19 results suggest that the intersegment interactions of segment 3 and other segments are  
20 rearranged in the mutant viruses. To characterize the specific intersegment interactions in

1 the wild type and the mutant viruses, a cluster analysis of the overall contact scores in  
2 each intersegment combination was performed (Figure 6C). In the wild type virus, the  
3 clustering analysis found three clusters where the contact scores show similar tendency:  
4 segments 1, 2, and 3, segments 5 and 7, and segments 4, 6, and 8. The interactions of any  
5 segment of the first cluster and other cluster segments were rearranged in both the 87mut  
6 and 87rec viruses, while the connection of the segment pair between the second cluster  
7 and the third cluster was maintained. Taken together, our analysis showed the  
8 rearrangement of intersegment interactions that occurred mainly in segments 1, 2, and 3  
9 by the conformational changes of the secondary structure in segment 5.

## 1 Discussion

2 We utilized both DMS-seq and SHAPE-seq to uncover the secondary structures of vRNA  
3 with the viral proteins in the virion because of the difference of their individual  
4 advantages. The median of probabilities from the virion and the vRNP labeled with DMS  
5 was higher than that from the DMS-labeled vRNA (Figure 1A). On the other hand, the  
6 median of probabilities labeled with NAI was lower than that from the NAI-labeled  
7 vRNA in SHAPE-seq (Figure 1A). The specificity of DMS and NAI to modify moieties  
8 of a single-stranded RNA is different. NAI has been shown to modify the 2'-OH group in  
9 the ribose backbone, whereas the vRNA has been shown to bind to NP via the  
10 phosphodiester backbone [46]. The reactivity of NAI and DMS is affected by not only  
11 RNA structure but RNA binding proteins such as NP. The opposite reactivity results of  
12 DMS-seq and SHAPE-seq can be explained by the accessibility of DMS and NAI to  
13 nucleotides in the RNA-protein complex. The probability of high-NP binding regions in  
14 the vRNP and virion was higher than that of the other regions, while the opposite was  
15 observed in the vRNA (Table S2). Thus, we conclude that the secondary structure of  
16 vRNA is likely to be dissolved by binding NP.

17 A previous *in silico* analysis showed that nucleotide positions 87 – 130 of  
18 segment 5 could form a pseudoknot structure [24] while CLIP analyses showed that this  
19 region was a low NP binding region [28,29]. In addition, SHAPE-MaP analysis showed  
20 that this region formed a pseudoknot structure in the virion [19]. We showed a more

1 precise structure of this region in vRNP form by using two comprehensive RNA structural  
2 sequencing with robust statistical analysis. While other additional pseudoknot structure  
3 regions were predicted in nucleotide positions 397 – 518 of segments 1 and nucleotide  
4 positions 804 – 867 of segment 8 [29], we did not detect these regions as pseudoknot  
5 structures from our DMS-seq or SHAPE-seq results. Moreover, the RNA secondary  
6 structure prediction by IPknot showed that these regions do not form the pseudoknot  
7 structure. Thus, these regions might be unlikely to form pseudoknot structures in the  
8 virion. Our structural analyses showed that RNA structures could be formed on vRNP but  
9 could not identify the precise RNA structure except for the pseudoknot structure on  
10 segment 5. One of the reasons why identifying precise vRNA structures in virion is  
11 difficult may be diversity in the structure of vRNAs in the virion. In addition, the selected  
12 regions within vRNP can interact with multiple regions in other segments (Figure 5A)  
13 [18]. These multiple intersegment interactions at the same region also could be explained  
14 by the structural diversity of vRNP in the virion. The structural multi-integrated omics  
15 analysis in a single virion would be necessary to reveal the global secondary structure of  
16 the viral RNA genome.

17 The secondary structure of the pseudoknot region in segment 5 was  
18 considerably different between the wild type and the 87mut viruses (Figure 3), and  
19 replication of vRNAs, particularly segment 3 which did not have mutations, was reduced  
20 in the cells infected with the 87mut virus (Figure 4A). Reduction of segment 3 replication

1 could induce the reduction of PA mRNA, which is synthesized from segment 3 vRNA  
2 and encodes one of the viral polymerase subunits, resulting in the reduction of replication  
3 of all segments. Suboptimal codon pairs of viral mRNA reduce mRNA stability and  
4 translation efficiency of the deoptimized gene and that IAV with maximized frequencies  
5 of CpG dinucleotides in segment 5 showed attenuation in cell culture [47]. CpGs in  
6 segment 5 of the 87mut and 87rec viruses are reduced compared to that of the wild type  
7 virus, and the average codon pair scores [48] of the 87mut and 87rec viruses are  
8 comparable to that of the wild type virus (wild type: 0.0066, 87mut: 0.0081, and 87rec:  
9 0.0076). Thus, the secondary structure changes by introducing synonymous mutations  
10 rather than suboptimal codon pairs and the frequency of CpG dinucleotides affects the  
11 replication defect. The secondary structure changes could induce NP repositioning. It is  
12 possible that repositioning of NP occurs in segment 3 by the effects of reconstitution of  
13 the intersegment interactions in the 87mut virus. Further analysis will be required to  
14 clarify the detailed molecular mechanism underlying the replication defect of segment 3  
15 in the 87mut virus. The propagation of the 87rec virus was comparable with that of the  
16 wild type virus (Figure 2B) though the pseudoknot structure at nucleotide positions 87 –  
17 130 of segment 5 was not formed (Figure 3D). Replication of segments in cells infected  
18 with the 87rec virus was delayed, and the amount of vRNAs in the 87rec virus was  
19 reduced (Figure 4). These results indicate that the phenotype is not fully complemented  
20 in the 87rec virus. The stem-loop structure at nucleotide positions 87 – 115 in the 87rec

1 virus could partially complement the reduction of replication of vRNAs in cells infected  
2 with the 87mut virus.

3 To identify specific intersegment interactions quantitatively, we used the  
4 iterative method which is a method for matrix balancing and IDR in our analysis. The  
5 contact score of intersegment interactions in our analysis is expected to be more reliable  
6 because the contact scores were normalized by the iterative method. The information on  
7 the reproducibility was included by IDR to filter out false positives in the final normalized  
8 contact scores. We identified a redundant and complex intersegment network (Figure 5).  
9 A recent study also revealed redundant and complex networks of RNA-RNA interactions  
10 in the IAV by using other global RNA-RNA interaction detection methods [18,19].  
11 Redundancy of the intersegment interaction could provide the plasticity that tolerates the  
12 loss of some intersegment interactions [49]. This plasticity may allow the IAV to escape  
13 an established immunity by mutations, while excess interactions may prevent the segment  
14 reassortment which also generates the diversity of IAV. Thus, the balance of intersegment  
15 interactions may be a factor for determining the diversity of IAV. Our LIGR-seq analysis  
16 identified clusters of segment interactions, and these clusters were largely maintained in  
17 the 87mut and 87rec viruses (Figure 6C). It has been reported that specific segments play  
18 more important roles than the other segments for viral genome packaging [9,11], and  
19 sequential vRNP associations during cytoplasmic transport of viral genome were  
20 observed [50,51]. Our findings raise the possibility that the cluster of segment interactions



1 generates the hierarchy of segments for viral genome packaging.

2 Nucleotide positions 1 – 200 of segment 5 are one of the hotspots of

3 intersegment interactions, and nucleotide changes in this region decreased the

4 intersegment interactions not only at this site but between other segments (Figure S12C).

5 The finding that nucleotide changes in a hotspot induced a genome-wide rearrangement

6 of intersegment interactions has been reported [18]. Our results indicate that the

7 unwinding of the pseudoknot structure induces a rearrangement of intersegment

8 interactions. The total contact scores of segment 3 in the 87mut virus were decreased, and

9 that of segment 7 was increased (Figure 6B). The intersegment interactions of segment 3

10 with other segments were equally decreased except for those between segments 3 and 7

11 (Figure 6C). One possible explanation of this finding is that segment 3 is eliminated from

12 the center of the ‘7+1’ vRNP arrangement in the 87mut virus by disrupting the pseudoknot

13 structure of segment 5. The total contact scores of segments 1 and 3 in the 87rec virus

14 were decreased through the virus propagation of the 87rec virus was comparable with that

15 of the wild type virus (Figure 6B). Nucleotide positions 87 – 130 of segment 5 did not

16 form a pseudoknot structure in the 87rec virus, but nucleotide positions 87 – 115 form a

17 stem-loop structure (Figure 3). This stem-loop structure partially complements not only

18 the reduction of replication of vRNAs but the intersegment interaction rearrangement

19 with a loss in replicative fitness.

20 Overall, our study presents the global secondary structure and intersegment

1 interactions of the IAV genome in the virion. We showed a functional pseudoknot  
2 structure on the vRNP. These findings will help us to understand the molecular  
3 mechanisms underlying the emergence of potential pandemic IAV that is generated by  
4 segment reassortment will contribute to developing a new class of anti-influenza drugs  
5 that bind and unwind the specific RNA structure in the IAV genome.

## 1 **Materials and methods**

### 2 **Cells**

3 MDCK cells were maintained in a minimal essential medium (MEM) (Sigma-Aldrich,  
4 ST. Louis, MO) containing 10% fetal bovine serum and penicillin/streptomycin (Nacalai  
5 Tesque, Kyoto, Japan). HEK293T cells were maintained in a Dulbecco's modified Eagle's  
6 medium (DMEM) with high glucose concentration (Sigma-Aldrich) containing 10% fetal  
7 bovine serum and penicillin/streptomycin.

8

### 9 **Viruses**

10 Influenza virus A/PR/8/34 (H1N1) (PR8) was grown in the allantoic sacs of 11 days-old  
11 chick embryos at 35.5°C for 48 h. The purified virion and the vRNP from the purified  
12 virion were prepared as previously described [52]. To construct the pPolI-PR8 mutant  
13 vector, an inverted PCR was performed using the pPolI-PR8 segment 5 vector as a  
14 template with specific primer sets (Primers used in this study were listed in Table S4).  
15 After DpnI treatment, phosphorylation, ligation, and transformation into an *Escherichia*  
16 *coli* Mach1 (Thermo Fisher Scientific) were performed. Recombinant viruses were  
17 generated using a reverse genetics approach [53]. Viral protein expression vectors [53]  
18 and the viral RNA expression vectors derived from the PR8 strain [54] were transfected  
19 to 293T cells. To propagate the recombinant virus, MDCK cells were infected with the  
20 recombinant virus at a multiplicity of infection (MOI) of 0.1. At 48 h post infection (hpi),

1 the supernatants were collected, and cell debris were removed by low-speed  
2 centrifugation ( $3k \times g$ , 5 min). The virus titer was determined by a plaque assay. To  
3 prepare purified virion, MDCK cells were infected with the recombinant virus at an MOI  
4 of 0.1, and the supernatant was collected at 48 hpi. After removal of cell debris by low-  
5 speed centrifugation ( $500 \times g$ , 5 min) and filtration through a 0.45- $\mu$ m filter, the  
6 supernatant was ultracentrifuged at  $100k \times g$  for 1.5 h using an SW28 rotor (Beckman  
7 Coulter, Brea, CA) at 4°C. The pellet was suspended in PBS(-) and centrifuged on 30%  
8 to 60% sucrose gradients in PBS(-) at  $100k \times g$  for 1.5 h in an SW28 rotor at 4°C. Viral  
9 bands were pooled and re-precipitated by centrifugation in PBS(-) at  $120k \times g$  for 1.5 h  
10 in an SW55 rotor (Beckman Coulter) at 4°C. The precipitated virion was suspended in a  
11 DMS buffer (40 mM Hepes-NaOH [pH 7.4], 100 mM NaCl, and 0.5 mM MgCl<sub>2</sub>) or  
12 PBS(-) and stored at -80°C until use.

13

#### 14 **DMS-seq and SHAPE-seq**

15 The vRNA was prepared by proteinase K treatment of virion purified from the allantoic  
16 fluid at 37°C for 30 min in SDS buffer (0.25% SDS and 100  $\mu$ g/ml proteinase K in PBS(-))  
17 followed by phenol/chloroform extraction. NAI was synthesized using a previously  
18 described method [34]. One  $\mu$ l of DMS (Wako Pure Chemical Industries, Osaka, Japan)  
19 or 5  $\mu$ l of NAI was added to the purified virion (5  $\mu$ l of the purified virion from allantoic  
20 fluid or from 80 ml of cell culture supernatant of infected cells), vRNP (25  $\mu$ l of vRNP

1 fraction), or vRNA (from 5  $\mu$ l of purified virion) in 100  $\mu$ l of DMS buffer. After  
2 incubation for 5 min (DMS) or 15 min (NAI) at 25°C, 10  $\mu$ l of 1 M DTT was added to  
3 stop the reaction. Then, the RNA was extracted with phenol/chloroform. Sequencing  
4 libraries were prepared using a previously described method [55]. Briefly, cDNA was  
5 synthesized with random hexamers containing the Illumina adapters at their 5'- ends using  
6 ReverTra Ace (Toyobo, Osaka, Japan). The ssDNA linker containing a 5' phosphate and  
7 3' C3 spacer was ligated to the synthesized cDNA using 20 U of the Circligase I (Lucigen,  
8 Middleton, WI). The resultant cDNA was amplified by an adapter-based PCR using the  
9 KAPA HiFi DNA polymerase (Roche, Basel, Switzerland). Sequencing was performed  
10 using a MiSeq (Illumina, San Diego, CA) ( $2 \times 75$ -bp PE) and NovaSeq6000 (Illumina)  
11 ( $2 \times 150$ -bp PE). The sequence data have been deposited in DDBJ Sequence Read  
12 Archive (DRA Accession: DRA009494 and DRA012096). Raw reads were cleaned and  
13 trimmed with Trimmomatic v0.36 [56], and the cleaned reads were aligned to the  
14 A/PR/8/34 genome using bowtie2 with default parameters. We performed duplicate  
15 DMS-seq and SHAPE-seq experiments on two independent samples, and the reactivities  
16 of each nucleotide were calculated using reactIDR [37] with --DMS option and with a  
17 default setting, respectively, and BUMHMM [36] with a default setting. Base-pairing  
18 probabilities were calculated by Superfold [40] from the probabilities of reactIDR.  
19 Computational prediction of the RNA secondary structure was performed by MXfold2  
20 [42] and IPknot [41].

1           To analyze the probability of high-NP binding regions, NP PAR-CLIP data sets  
2 (PR8 strain) were downloaded from Sequence Read Archive (SRX3545111) and aligned  
3 to the PR8 genome using bowtie2 with default parameters. The coverage of each  
4 nucleotide of PAR-CLIP and control RNA experiments was calculated by IGV [57]. We  
5 normalized the number of coverages per nucleotide to the total number of coverages to  
6 yield a normalized coverage ratio from both PAR-CLIP and control RNA sequencing.  
7 vRNA nucleotides with fold-change >2 were identified, and the regions were extracted.  
8 Due to the number of reads, we used only one dataset of PAR-CLIP and control RNA-  
9 seq.

10

#### 11 **AMT cross-linking and RNA ligation experimental method**

12 The purified virion in PBS(-) was treated with or without AMT (final concentration 100  
13 µg/ml) and cross-linked using 365 nm UV for 20 min (1.56 J/cm<sup>2</sup>). AMT was added again  
14 at 10 min after UV irradiation. The viral RNA was extracted with phenol/chloroform and  
15 digested with the NEBNext Magnesium RNA Fragmentation Module (New England  
16 Biolabs, Ipswich, MA) at 94°C for 2.5 min. The fragmented RNA was treated with 15 U  
17 of CIAP (Takara Bio, Otsu, Japan) at 37°C for 30 min, and phosphorylation was carried  
18 out by the 10 U of T4 polynucleotide kinase (Toyobo) at 37°C for 1 h.

19           RNA pull-down procedure was performed using a modification of an RNA  
20 antisense purification method previously described for long non-coding RNA and

1 influenza virus mRNA [58,59]. cDNA of the PR8 strain was synthesized with the Uni12  
2 primer using ReverTra Ace. The fragments of each segment were amplified with a linker  
3 sequence containing specific primers using Taq polymerase (Roche). Specific primers  
4 with a linker sequence were designed to amplify every 120 bp of the coding region with  
5 a 15-bp overlapped region (PCR primers were listed in Table S4). To synthesize the  
6 biotinylated cDNA probe, a second PCR procedure was performed with the biotinylated  
7 linker primer using Taq polymerase. The biotinylated cDNA probe for each segment was  
8 mixed with the Dynabeads MyOne Streptavidin C1 (Thermo Fisher Scientific, Waltham,  
9 MA) and incubated on a rotating wheel at 37°C for 1 h in a LiCl hybridization buffer (10  
10 mM Tris-HCl [pH 7.9], 500 mM LiCl, 1 mM EDTA, and 0.1 % NP-40). The beads were  
11 washed with the LiCl hybridization buffer and 1x SSPE and were suspended and  
12 incubated in 0.15 M NaOH for 10 min. After incubation, the mixture was neutralized with  
13 100 mM Tris-HCl (pH 7.9) and 1.25 M AcOH. The beads were washed with 0.1 M NaOH  
14 and were suspended in the LiCl hybridization buffer. The cross-linked RNA was boiled  
15 at 85°C for 3 min and was added to the beads. The beads were incubated at 55°C in a  
16 Thermomixer (Eppendorf, Hamburg, Germany) at 1,500 rpm for 2 h. The beads were  
17 washed with 1x and 0.1x SSPE at 55°C. Proximity ligation was performed with 40 U of  
18 the T4 RNA ligase I at 16°C for 16 h in an RNA ligase buffer, and the beads were mixed  
19 in a Thermomixer at 1,000 rpm for 15 sec every 15 min. The vRNA was eluted with 5 U  
20 of DNase I (Takara Bio) at 37°C for 30 min in a DNase buffer (40 mM Tris-HCl [pH 7.5],

1 8 mM MgCl<sub>2</sub>, and 5 mM DTT) and was extracted with phenol/chloroform. The eluted  
2 vRNA was treated with 10 U of RNaseR (Lucigen) in an RNaseR buffer (20 mM Tris-  
3 HCl [pH 8.0], 100 mM KCl, and 0.1 mM MgCl<sub>2</sub>) at 37 °C for 30 min and was extracted  
4 with phenol/chloroform. The cDNA was synthesized with a random hexamer using the  
5 SuperScript III (Thermo Fisher Scientific) and the NEBNext mRNA Second Strand  
6 Synthesis Module (New England Biolabs). Sequencing libraries were constructed using  
7 the KAPA Hyper Prep Kit (Roche) or NEBNext UltraII DNA Library Prep Kit for  
8 Illumina (New England Biolabs). Sequencing was performed using a HiSeq2500  
9 sequencer (Illumina) (2 × 100-bp PE) and a NovaSeq6000 sequencer (2 × 150-bp PE).  
10 The sequence data have been deposited in DDBJ Sequence Read Archive (DRA  
11 Accession: DRA005778, DRA009492, DRA009493, and DRA012096)

12

### 13 **Data analysis for segment interactions**

14 Raw reads were cleaned and trimmed into the first 25 bases with Trimmomatic v0.36 [56].  
15 The cleaned reads were aligned to the A/PR/8/34 genome using bowtie2 with default  
16 parameters [60]. Obtained sequencing reads were classified into two categories:  
17 intersegment and intrasegment interaction. We detected the former interaction by the  
18 paired-end reads that were mapped at two different segments and the latter ones that were  
19 mapped to the same segment at an inverted direction and a long insert length (more than  
20 500 nt). The start positions of the selected pair-reads were counted in every 100 nt, and



1 the contact map was constructed for the intra- and intersegment interactions. To normalize  
2 the biases, we adapted the iterative method which has been employed for the Hi-C  
3 analysis [44]. The raw contact of each bin in the contact map was divided by the sum of  
4 the contacts in the whole row and the sum of the contacts in the whole column. This  
5 calculation was repeated until it converges. The normalized count in each 100 nt bin was  
6 referred to as the contact score. To discriminate accurately between the true and false  
7 signals, we performed LIGR-seq in the duplicate experiments and utilized an  
8 irreproducible discovery rate (IDR) [45]. IDR compares a pair of ranked lists by contact  
9 scores and assigns IDR scores that reflect its reproducibility. The contact scores of all  
10 regions containing both intrasegment and intersegment regions of duplicate experiments  
11 were analyzed by IDR, and the IDR score of each region was determined. The  
12 intersegment interactions were ranked by IDR value, and intersegment interactions with  
13 IDR scores from the top to the 100th were used for further analysis. Total contact scores  
14 of all the two-segment combinations from LIGR-seq were calculated. To calculate the  
15 reciprocal number of contact scores of all the two-segment combinations, 1 was added to  
16 the contact scores of all the combinations. Cluster analysis by the Ward method was  
17 performed using the reciprocal number as distance.

18

## 19 **RT-qPCR**

20 Total RNA was extracted from MDCK cells infected at an MOI of 1 using the ISOGEN

1 reagent (Nippon Gene, Tokyo, Japan). For the preparation of the vRNA in the supernatant  
2 from the infected cells, MDCK cells were infected with the virus at an MOI of 0.1, and  
3 the cells were suspended in MEM containing 0.6  $\mu\text{g/ml}$  TPCK-trypsin (Sigma-Aldrich).  
4 At 48 hpi, the supernatant was collected, and cell debris was removed by low-speed  
5 centrifugation ( $500 \times g$ , 5 min) and filtration through a 0.45- $\mu\text{m}$  filter (EMD Millipore,  
6 Billerica, MA). The pre-cleared supernatant was layered on PBS(-) containing 30%  
7 sucrose and centrifuged at  $130k \times g$  for 1.5 h using an SW55 rotor at  $4^\circ\text{C}$ . The pellet was  
8 suspended in 100  $\mu\text{l}$  of PBS(-). The vRNA was extracted by phenol/chloroform.

9 For RT-qPCR, the cDNA was synthesized with the Uni12 primer using  
10 ReverTra Ace. The synthesized cDNA was mixed with the Thunderbird SYBR qPCR mix  
11 (Toyobo) and a specific primer set for each segment. The qPCR reactions were performed  
12 using a Thermal Cycler Dice Real-Time System TP800 (Takara Bio), and the relative  
13 amounts of each segment were calculated.

14

### 15 **FACS analysis**

16 Rabbit polyclonal antibodies against NP [61] and M1 [62] and mouse monoclonal  
17 antibody RA5-22 against HA (BEI Resources, NIAID, NIH, Bethesda, MD) and  
18 mAb61A5 against NP [63] were used for FACS analysis. Alexa Fluor 488-conjugated  
19 anti-mouse IgG and Alexa Fluor 647-conjugated anti-rabbit IgG were purchased from  
20 Thermo Fisher Scientific and BioLegend (San Diego, CA), respectively.

1 MDCK cells were infected with the virus at an MOI of 0.01. At 14 hpi, the  
2 infected cells were collected by trypsin and fixed with 4% paraformaldehyde at 25°C for  
3 10 min. The fixed cells were permeabilized with 0.2% NP-40 in PBS(-) at 25°C for 15min.  
4 The cells were immersed in 0.2% BSA in PBS(-) at 25°C for 1 h and incubated with  
5 primary antibodies at 25°C for 1 h. After washing with PBS(-), the cells were incubated  
6 with secondary antibodies at 25°C for 1 h. The cells were suspended in PBS(-) and  
7 analyzed by the FACS Lyric Flow Cytometer (BD, Franklin Lakes, NJ).

## 1 **Acknowledgements**

2           We thank Dr. Yoshihiro Kawaoka (University of Tokyo) for kindly providing  
3 plasmids for the reverse genetics system, Dr. Kyosuke Nagata (University of Tsukuba)  
4 for kindly providing polyclonal anti-NP antibody, Dr. Fumitaka Momose (Kitasato  
5 University) for kindly providing monoclonal anti-NP antibody and plasmids, Dr.  
6 Nobuyuki Kobayashi (Nagasaki University) for kindly providing anti-M1 antibody, and  
7 Ms. Yukiko Iwata for technical support of experiments. This work was partly performed  
8 in the Cooperative Research Project Program of the Medical Institute of Bioregulation,  
9 Kyushu University. This work was supported by JSPS KAKENHI Grant Number  
10 25871077, 15K21607, and 19K07598 to N.T., JSPS KAKENHI Grant Number 221S0002  
11 and 16H06279 (PAGS), Japan Program for Infectious Diseases Research and  
12 Infrastructure from AMED Grant Number JP20wm0325008 to N.T., Takeda Science  
13 Foundation, GSK Japan Research Grant 2016, and the Waksman Foundation of Japan to  
14 N.T..

15

16

## 1 References

- 2 1. Noda T, Murakami S, Nakatsu S, Imai H, Muramoto Y, Shindo K, et al.  
3 Importance of the 1+7 configuration of ribonucleoprotein complexes for  
4 influenza A virus genome packaging. *Nat Commun.* 2018;9: 1–10.  
5 doi:10.1038/s41467-017-02517-w
- 6 2. Noda T, Sagara H, Yen A, Takada A, Kida H, Cheng RH, et al. Architecture of  
7 ribonucleoprotein complexes in influenza A virus particles. *Nature.* 2006;439:  
8 490–492. doi:10.1038/nature04378
- 9 3. Arranz R, Coloma R, Chichon FJ, Conesa JJ, Carrascosa JL, Valpuesta JM, et al.  
10 The Structure of Native Influenza Virion Ribonucleoproteins. *Science (80- )*.  
11 2012;338: 1634–1637. doi:10.1126/science.1228172
- 12 4. Gerber M, Isel C, Moules V, Marquet R. Selective packaging of the influenza A  
13 genome and consequences for genetic reassortment. *Trends Microbiol. Elsevier*  
14 *Ltd;* 2014;22: 446–455. doi:10.1016/j.tim.2014.04.001
- 15 5. Hutchinson EC, Curran MD, Read EK, Gog JR, Digard P. Mutational analysis of  
16 cis-acting RNA signals in segment 7 of influenza A virus. *J Virol.* 2008;82:  
17 11869–11879. doi:10.1128/JVI.01634-08
- 18 6. Hutchinson EC, Wise HM, Kudryavtseva K, Curran MD, Digard P.  
19 Characterisation of influenza A viruses with mutations in segment 5 packaging  
20 signals. *Vaccine.* 2009;27: 6270–6275. doi:10.1016/j.vaccine.2009.05.053
- 21 7. Marsh GA, Rabadan R, Levine AJ, Palese P, Rabadán R, Levine AJ, et al. Highly  
22 Conserved Regions of Influenza A Virus Polymerase Gene Segments Are  
23 Critical for Efficient Viral RNA Packaging. *J Virol.* 2008;82: 2295–2304.  
24 doi:10.1128/JVI.02267-07
- 25 8. Marsh GA, Hatami R, Palese P. Specific residues of the influenza A virus  
26 hemagglutinin viral RNA are important for efficient packaging into budding  
27 virions. *J Virol.* 2007;81: 9727–9736. doi:10.1128/JVI.01144-07
- 28 9. Muramoto Y, Takada A, Fujii K, Noda T, Iwatsuki-Horimoto K, Watanabe S, et  
29 al. Hierarchy among viral RNA (vRNA) segments in their role in vRNA  
30 incorporation into influenza A virions. *J Virol. Am Soc Microbiol;* 2006;80:  
31 2318–2325. doi:10.1128/JVI.80.5.2318
- 32 10. Zhao L, Peng Y, Zhou K, Cao M, Wang J, Wang X, et al. New Insights into the  
33 Nonconserved Noncoding Region of the Subtype-Determinant Hemagglutinin  
34 and Neuraminidase Segments of Influenza A Viruses. *J Virol.* 2014;88: 11493–  
35 11503. doi:10.1128/JVI.01337-14
- 36 11. Gao Q, Chou Y-Y, Doganay S, Vafabakhsh R, Ha T, Palese P. The influenza A  
37 virus PB2, PA, NP and M segments play a pivotal role during genome packaging.  
38 *J Virol.* 2012;86: 7043–7051. doi:10.1128/JVI.00662-12
- 39 12. Gavazzi C, Isel C, Fournier E, Moules V, Cavalier A, Thomas D, et al. An in

- 1 vitro network of intermolecular interactions between viral RNA segments of an  
2 avian H5N2 influenza A virus: comparison with a human H3N2 virus. *Nucleic*  
3 *Acids Res.* 2013;41: 1241–1254. doi:10.1093/nar/gks1181
- 4 13. Gavazzi C, Yver M, Isel C, Smyth RP, Rosa-Calatrava M, Lina B, et al. A  
5 functional sequence-specific interaction between influenza A virus genomic  
6 RNA segments. *Proc Natl Acad Sci U S A.* 2013;110: 16604–16609.  
7 doi:10.1073/pnas.1314419110
- 8 14. Fournier E, Moules V, Essere B, Paillart JC, Sirbat JD, Cavalier A, et al.  
9 Interaction network linking the human H3N2 influenza A virus genomic RNA  
10 segments. *Vaccine.* Elsevier Ltd; 2012;30: 7359–7367.  
11 doi:10.1016/j.vaccine.2012.09.079
- 12 15. Gilbertson B, Zheng T, Gerber M, Printz-Schweigert A, Ong C, Marquet R, et al.  
13 Influenza NA and PB1 Gene Segments Interact during the Formation of Viral  
14 Progeny: Localization of the Binding Region within the PB1 Gene. *Viruses.*  
15 2016;8: 238. doi:10.3390/v8080238
- 16 16. Fournier E, Moules V, Essere B, Paillart J-C, Sirbat J-D, Isel C, et al. A  
17 supramolecular assembly formed by influenza A virus genomic RNA segments.  
18 *Nucleic Acids Res.* 2012;40: 2197–2209. doi:10.1093/nar/gkr985
- 19 17. Noda T, Sugita Y, Aoyama K, Hirase A, Kawakami E, Miyazawa A, et al. Three-  
20 dimensional analysis of ribonucleoprotein complexes in influenza A virus. *Nat*  
21 *Commun.* Nature Publishing Group; 2012;3: 639. doi:10.1038/ncomms1647
- 22 18. Le Sage V, Kanarek JP, Snyder DJ, Cooper VS, Lakdawala SS, Lee N. Mapping  
23 of Influenza Virus RNA-RNA Interactions Reveals a Flexible Network. *Cell*  
24 *Rep.* Elsevier Company.; 2020;31: 107823. doi:10.1016/j.celrep.2020.107823
- 25 19. Dadonaite B, Gilbertson B, Knight ML, Trifkovic S, Rockman S, Laederach A,  
26 et al. The structure of the influenza A virus genome. *Nat Microbiol.* Springer US;  
27 2019;4: 1781–1789. doi:10.1038/s41564-019-0513-7
- 28 20. Rausch JW, Sztuba-Solinska J, Le Grice SFJ. Probing the structures of viral  
29 RNA regulatory elements with SHAPE and related methodologies. *Front*  
30 *Microbiol.* 2018;8: 1–15. doi:10.3389/fmicb.2017.02634
- 31 21. Reich S, Guilligay D, Pflug A, Malet H, Berger I, Crépin T, et al. Structural  
32 insight into cap-snatching and RNA synthesis by influenza polymerase. *Nature.*  
33 2014; doi:10.1038/nature14009
- 34 22. Pflug A, Guilligay D, Reich S, Cusack S. Structure of influenza A polymerase  
35 bound to the viral RNA promoter. *Nature.* Nature Publishing Group; 2014;516:  
36 355–360. doi:10.1038/nature14008
- 37 23. Wandzik JM, Kouba T, Karuppusamy M, Pflug A, Drncova P, Provaznik J, et al.  
38 A Structure-Based Model for the Complete Transcription Cycle of Influenza  
39 Polymerase. *Cell.* Elsevier Inc.; 2020;181: 877-893.e21.  
40 doi:10.1016/j.cell.2020.03.061

- 1 24. Gulyaev AP, Tsyganov-Bodounov A, Spronken MIJ, Van Der Kooij S, Fouchier  
2 RAM, Olsthoorn RCL. RNA structural constraints in the evolution of the  
3 influenza A virus genome NP segment. *RNA Biol.* 2014;11: 942–952.  
4 doi:10.4161/rna.29730
- 5 25. Kobayashi Y, Dadonaite B, Doremalen N Van, Barclay WS, Pybus OG.  
6 Computational and molecular analysis of conserved influenza A virus RNA  
7 secondary structures involved in infectious virion production. *RNA Biol.*  
8 2016;13: 883–894. doi:10.1080/15476286.2016.1208331
- 9 26. Gulyaev AP, Spronken MI, Richard M, Schrauwen EJA, Olsthoorn RCL,  
10 Fouchier RAM. Subtype-specific structural constraints in the evolution of  
11 influenza A virus hemagglutinin genes. *Sci Rep.* 2016;6: 1–15.  
12 doi:10.1038/srep38892
- 13 27. Takizawa N, Ogura Y, Fujita Y, Noda T, Shigematsu H, Hayashi T, et al. Local  
14 structural changes of the influenza A virus ribonucleoprotein complex by single  
15 mutations in the specific residues involved in efficient genome packaging.  
16 *Virology.* Elsevier Inc.; 2019;531: 126–140. doi:10.1016/j.virol.2019.03.004
- 17 28. Lee N, Le Sage V, Nanni A V., Snyder DJ, Cooper VS, Lakdawala SS. Genome-  
18 wide analysis of influenza viral RNA and nucleoprotein association. *Nucleic*  
19 *Acids Res.* 2017;45: 8968–8977. doi:10.1093/nar/gkx584
- 20 29. Williams GD, Townsend D, Wylie KM, Kim PJ, Amarasinghe GK, Kutluay SB,  
21 et al. Nucleotide resolution mapping of influenza A virus nucleoprotein-RNA  
22 interactions reveals RNA features required for replication. *Nat Commun.*  
23 Springer US; 2018;9: 465. doi:10.1038/s41467-018-02886-w
- 24 30. Sexton AN, Wang PY, Rutenberg-Schoenberg M, Simon MD. Interpreting  
25 Reverse Transcriptase Termination and Mutation Events for Greater Insight into  
26 the Chemical Probing of RNA. *Biochemistry.* 2017;56: 4713–4721.  
27 doi:10.1021/acs.biochem.7b00323
- 28 31. Rouskin S, Zubradt M, Washietl S, Kellis M, Weissman JS. Genome-wide  
29 probing of RNA structure reveals active unfolding of mRNA structures in vivo.  
30 *Nature.* Nature Publishing Group; 2014;505: 701–705. doi:10.1038/nature12894
- 31 32. Ding Y, Tang Y, Kwok CK, Zhang Y, Bevilacqua PC, Assmann SM. In vivo  
32 genome-wide profiling of RNA secondary structure reveals novel regulatory  
33 features. *Nature.* Nature Publishing Group; 2014;505: 696–700.  
34 doi:10.1038/nature12756
- 35 33. Wan Y, Qu K, Zhang QC, Flynn R a., Manor O, Ouyang Z, et al. Landscape and  
36 variation of RNA secondary structure across the human transcriptome. *Nature.*  
37 Nature Publishing Group; 2014;505: 706–709. doi:10.1038/nature12946
- 38 34. Spitale RC, Crisalli P, Flynn R a, Torre E a, Kool ET, Chang HY. RNA SHAPE  
39 analysis in living cells. *Nat Chem Biol.* Nature Publishing Group; 2013;9: 18–20.  
40 doi:10.1038/nchembio.1131

- 1 35. Lucks JB, Mortimer SA, Trapnell C, Luo S, Aviran S, Schroth GP, et al.  
2 Multiplexed RNA structure characterization with selective 2'-hydroxyl acylation  
3 analyzed by primer extension sequencing (SHAPE-Seq). *Proc Natl Acad Sci*.  
4 2011;108: 11063–11068. doi:10.1073/pnas.1106501108
- 5 36. Selega A, Sirocchi C, Iosub I, Granneman S, Sanguinetti G. Robust statistical  
6 modeling improves sensitivity of high-throughput RNA structure probing  
7 experiments. *Nat Methods*. Nature Publishing Group; 2017;14: 83–89.  
8 doi:10.1038/nmeth.4068
- 9 37. Kawaguchi R, Kiryu H, Iwakiri J, Sese J. reactIDR: evaluation of the statistical  
10 reproducibility of high-throughput structural analyses towards a robust RNA  
11 structure prediction. *BMC Bioinformatics*. BMC Bioinformatics; 2019;20: 130.  
12 doi:10.1186/s12859-019-2645-4
- 13 38. Mitchell D, Assmann SM, Bevilacqua PC. Probing RNA structure in vivo. *Curr*  
14 *Opin Struct Biol*. Elsevier Ltd; 2019;59: 151–158. doi:10.1016/j.sbi.2019.07.008
- 15 39. Sharma E, Sterne-Weiler T, O'Hanlon D, Blencowe BJ. Global Mapping of  
16 Human RNA-RNA Interactions. *Mol Cell*. Elsevier Inc.; 2016;62: 618–626.  
17 doi:10.1016/j.molcel.2016.04.030
- 18 40. Smola MJ, Rice GM, Busan S, Siegfried NA, Weeks KM. Selective 2'-hydroxyl  
19 acylation analyzed by primer extension and mutational profiling (SHAPE-MaP)  
20 for direct, versatile and accurate RNA structure analysis. *Nat Protoc*. 2015;10:  
21 1643–1669. doi:10.1038/nprot.2015.103
- 22 41. Sato K, Kato Y, Hamada M, Akutsu T, Asai K. IPknot: fast and accurate  
23 prediction of RNA secondary structures with pseudoknots using integer  
24 programming. *Bioinformatics*. 2011;27: i85–i93.  
25 doi:10.1093/bioinformatics/btr215
- 26 42. Etibor TA, Yamauchi Y, Amorim MJ. Liquid Biomolecular Condensates and  
27 Viral Lifecycles: Review and Perspectives. *Viruses*. 2021;13: 9–14.  
28 doi:10.3390/v13030366
- 29 43. Brooke CB, Ince WL, Wrammert J, Ahmed R, Wilson PC, Bennink JR, et al.  
30 Most Influenza A Virions Fail To Express at Least One Essential Viral Protein. *J*  
31 *Virol*. 2013;87: 3155–3162. doi:10.1128/JVI.02284-12
- 32 44. Imakaev M, Fudenberg G, McCord RP, Naumova N, Goloborodko A, Lajoie BR,  
33 et al. Iterative correction of Hi-C data reveals hallmarks of chromosome  
34 organization. *Nat Methods*. 2012;9: 999–1003. doi:10.1038/nmeth.2148
- 35 45. Li Q, Brown JB, Huang H, Bickel PJ. Measuring reproducibility of high-  
36 throughput experiments. *Ann Appl Stat*. 2011;5: 1752–1779. doi:10.1214/11-  
37 AOAS466
- 38 46. Ye Q, Krug RM, Tao YJ. The mechanism by which influenza A virus  
39 nucleoprotein forms oligomers and binds RNA. *Nature*. 2006;444: 1078–1082.  
40 doi:10.1038/nature05379



- 1 47. Gaunt E, Wise HM, Zhang H, Lee LN, Atkinson NJ, Nicol MQ, et al. Elevation  
2 of CpG frequencies in influenza A genome attenuates pathogenicity but enhances  
3 host response to infection. *Elife*. 2016;5: 1–19. doi:10.7554/eLife.12735
- 4 48. Coleman JR, Papamichail D, Skiena S, Futcher B, Wimmer E, Mueller S. Virus  
5 Attenuation by Genome-Scale Changes in Codon Pair Bias. *Science* (80- ).  
6 2008;320: 1784–1787. doi:10.1126/science.1155761
- 7 49. Bolte H, Rosu ME, Hagelauer E, García-Sastre A, Schwemmler M. Packaging of  
8 the Influenza Virus Genome Is Governed by a Plastic Network of RNA- and  
9 Nucleoprotein-Mediated Interactions. Schultz-Cherry S, editor. *J Virol*. 2018;93:  
10 1–11. doi:10.1128/JVI.01861-18
- 11 50. Haralampiev I, Prisner S, Nitzan M, Schade M, Jolmes F, Schreiber M, et al.  
12 Selective flexible packaging pathways of the segmented genome of influenza A  
13 virus. *Nat Commun*. 2020;11: 4355. doi:10.1038/s41467-020-18108-1
- 14 51. Majarian TD, Murphy RF, Lakdawala SS. Learning the sequence of influenza A  
15 genome assembly during viral replication using point process models and  
16 fluorescence in situ hybridization. De Boer RJ, editor. *PLOS Comput Biol*.  
17 2019;15: e1006199. doi:10.1371/journal.pcbi.1006199
- 18 52. Yamanaka K, Ishihama A, Nagata K. Reconstitution of influenza virus RNA-  
19 nucleoprotein complexes structurally resembling native viral ribonucleoprotein  
20 cores. *J Biol Chem*. 1990;265: 11151–5.
- 21 53. Neumann G, Watanabe T, Ito H, Watanabe S, Goto H, Gao P, et al. Generation  
22 of influenza A viruses entirely from cloned cDNAs. *Proc Natl Acad Sci*.  
23 1999;96: 9345–9350. doi:10.1073/pnas.96.16.9345
- 24 54. Ohkura T, Momose F, Ichikawa R, Takeuchi K, Morikawa Y. Influenza A virus  
25 hemagglutinin and neuraminidase mutually accelerate their apical targeting  
26 through clustering of lipid rafts. *J Virol*. 2014;88: 10039–10055.  
27 doi:10.1128/JVI.00586-14
- 28 55. Ding Y, Kwok CK, Tang Y, Bevilacqua PC, Assmann SM. Genome-wide  
29 profiling of in vivo RNA structure at single-nucleotide resolution using structure-  
30 seq. *Nat Protoc*. Nature Publishing Group; 2015;10: 1050–1066.  
31 doi:10.1038/nprot.2015.064
- 32 56. Bolger AM, Lohse M, Usadel B. Trimmomatic: a flexible trimmer for Illumina  
33 sequence data. *Bioinformatics*. 2014;30: 2114–2120.  
34 doi:10.1093/bioinformatics/btu170
- 35 57. Robinson JT, Thorvaldsdóttir H, Winckler W, Guttman M, Lander ES, Getz G, et  
36 al. Integrative genomics viewer. *Nat Biotechnol*. 2011;29: 24–26.  
37 doi:10.1038/nbt.1754
- 38 58. Engreitz JM, Pandya-Jones A, McDonel P, Shishkin A, Sirokman K, Surka C, et  
39 al. The Xist lncRNA Exploits Three-Dimensional Genome Architecture to  
40 Spread Across the X Chromosome. *Science* (80- ). 2013;341: 1237973.

- 1           doi:10.1126/science.1237973
- 2   59.   Simon LM, Morandi E, Luganini A, Gribaudo G, Martinez-Sobrido L, Turner  
3       DH, et al. In vivo analysis of influenza A mRNA secondary structures identifies  
4       critical regulatory motifs. *Nucleic Acids Res.* 2019;47: 7003–7017.  
5       doi:10.1093/nar/gkz318
- 6   60.   Langmead B, Salzberg SL. Fast gapped-read alignment with Bowtie 2. *Nat*  
7       *Methods.* 2012;9: 357–359. doi:10.1038/nmeth.1923
- 8   61.   Kawaguchi A, Momose F, Nagata K. Replication-coupled and host factor-  
9       mediated encapsidation of the influenza virus genome by viral nucleoprotein. *J*  
10      *Virol.* 2011;85: 6197–6204. doi:10.1128/JVI.00277-11
- 11   62.   Takizawa N, Watanabe K, Nouno K, Kobayashi N, Nagata K. Association of  
12      functional influenza viral proteins and RNAs with nuclear chromatin and sub-  
13      chromatin structure. *Microbes Infect.* 2006;8: 823–833.  
14      doi:10.1016/j.micinf.2005.10.005
- 15   63.   Momose F, Kikuchi Y, Komase K, Morikawa Y. Visualization of microtubule-  
16      mediated transport of influenza viral progeny ribonucleoprotein. *Microbes Infect.*  
17      2007;9: 1422–1433. doi:10.1016/j.micinf.2007.07.007
- 18

## 1 Supplemental figure

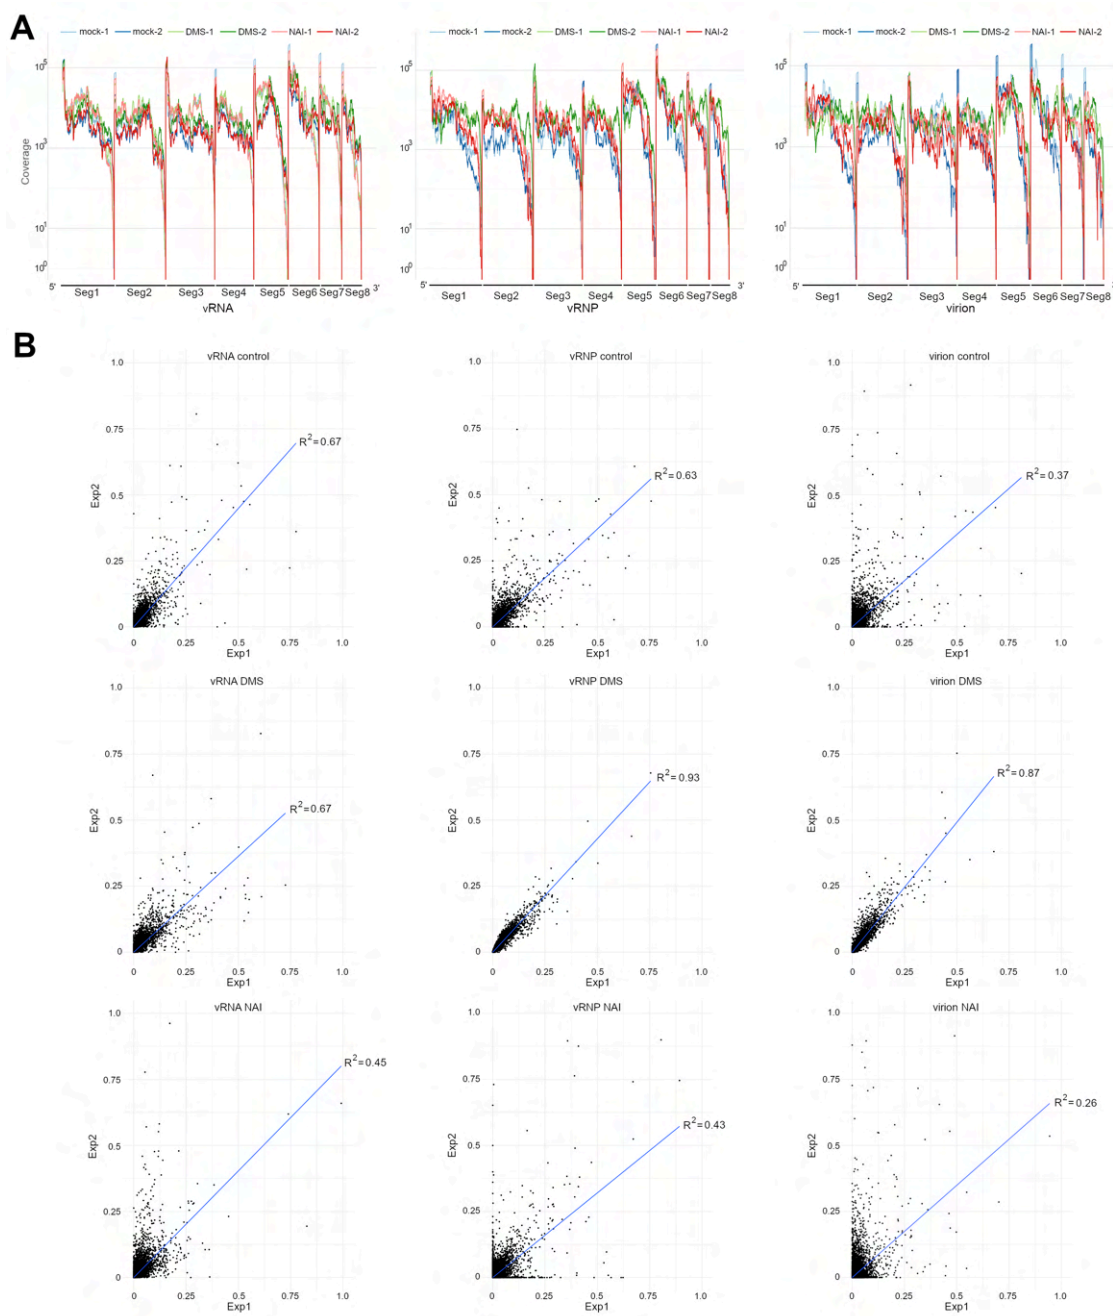

2

3 **Figure S1. Coverage and drop-off rate of duplicate DMS-seq and SHAPE-seq. (A)**

4 Coverage of DMS-seq and SHAPE-seq. Coverages of mock-treated samples, DMS-

5 treated samples, and NAI-treated samples were shown. (B) Scatter plot of drop-off rate

1 from duplicate experiments. The drop-off rate is defined as the value of stopped reverse  
2 transcription count divided by the coverage of each nucleotide, and the drop-off rates of  
3 duplicate experiments are plotted. The blue line means a regression line derived from the  
4 probabilities of each nucleotide. The coefficient of determination ( $R^2$ ) is shown in each  
5 graph.  
6

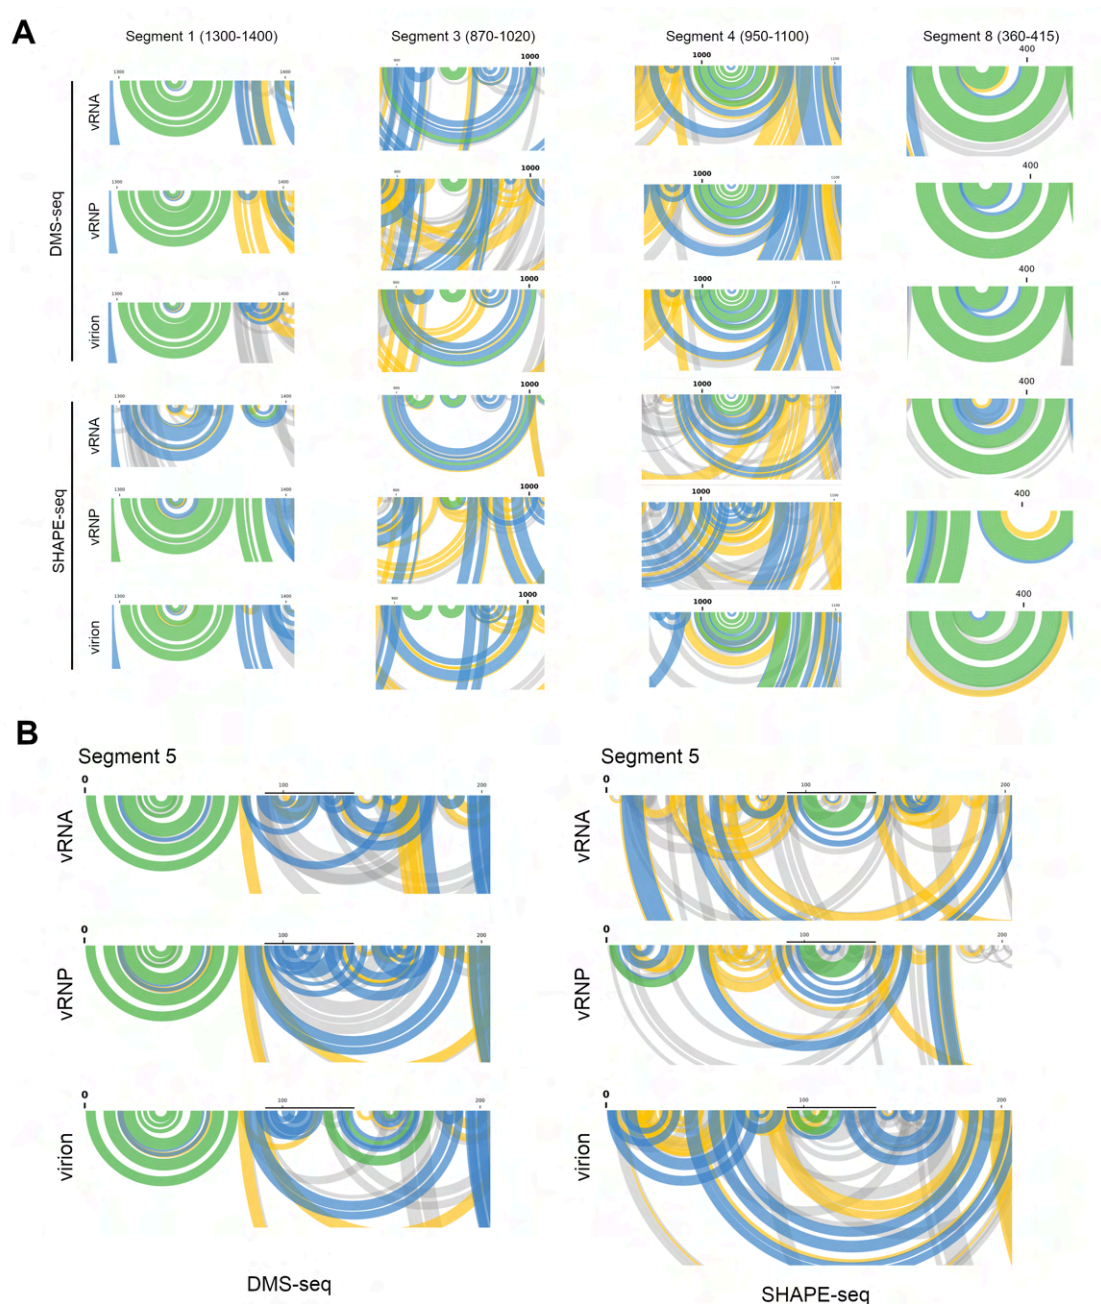

1

2 **Figure S2. Base-pairing probability from DMS-seq and SHAPE-seq.** Base-pairing

3 probabilities were calculated from the output of reactIDR by Superfold. Base-pairing

4 probabilities of secondary structure regions identified previous SHAPE-MaP analysis (A)

5 and that of nucleotide positions 1 – 200 of segment 5 (B) were shown. Base pairs were

1 plotted as arc, and green arcs, blue arcs, yellow arcs, and grey arcs indicate a base-pairing  
2 probability of 80%, 30%, 10%, 3% or higher, respectively. Bars in (B) indicate nucleotide  
3 positions 87 – 130.  
4

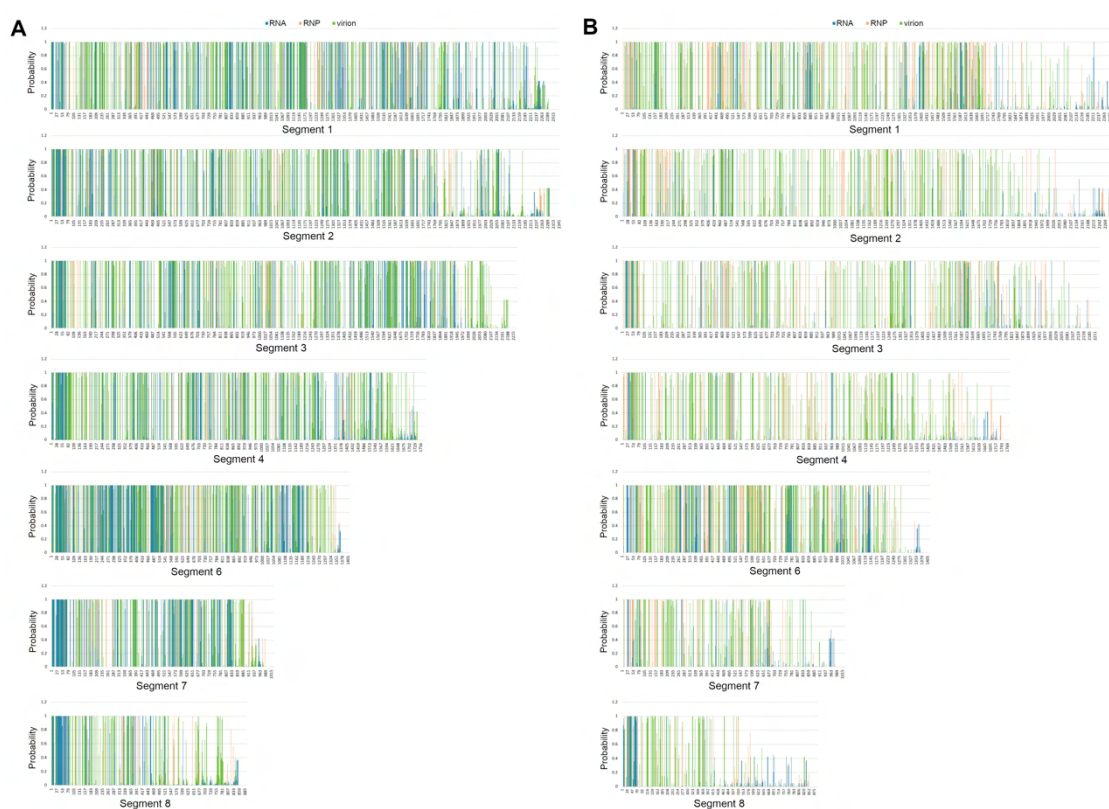

5  
6 **Figure S3. Probabilities from DMS-seq and SHAPE-seq.** The probabilities of each  
7 segment from DMS-seq (A) and SHAPE-seq (B) were calculated by BUMHMM. Y-  
8 axis: probability. X-axis: nucleotide position.  
9

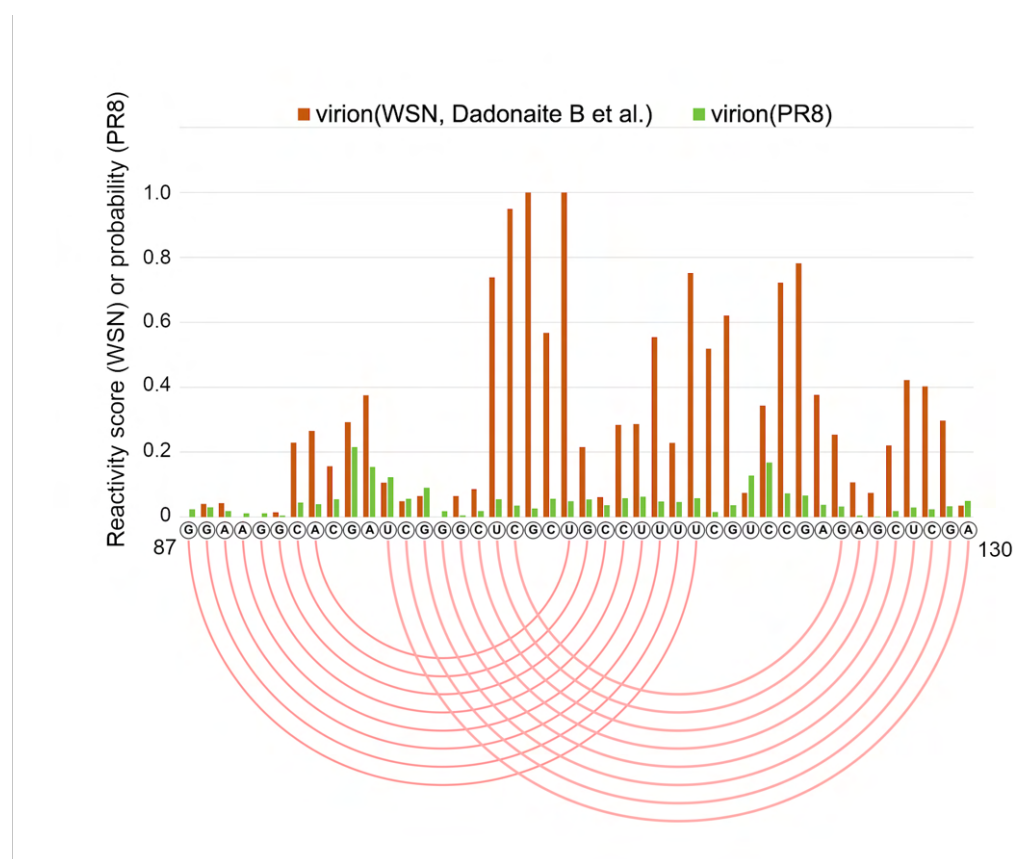

1

2 **Figure S4. Comparison of the reactivity score at nucleotide positions 87 – 130 of**  
3 **segment 5 by reactIDR with those by the previous study. Reactivity scores at**  
4 **nucleotide positions 87 – 130 of segment 5 from reported SHAPE-MaP (Dadonaite et al.,**  
5 **2019) and probability score of our SHAPE-seq analysis are shown. Pink lines indicate**  
6 **the predicted base pairs from our SHAPE-seq analysis.**

7

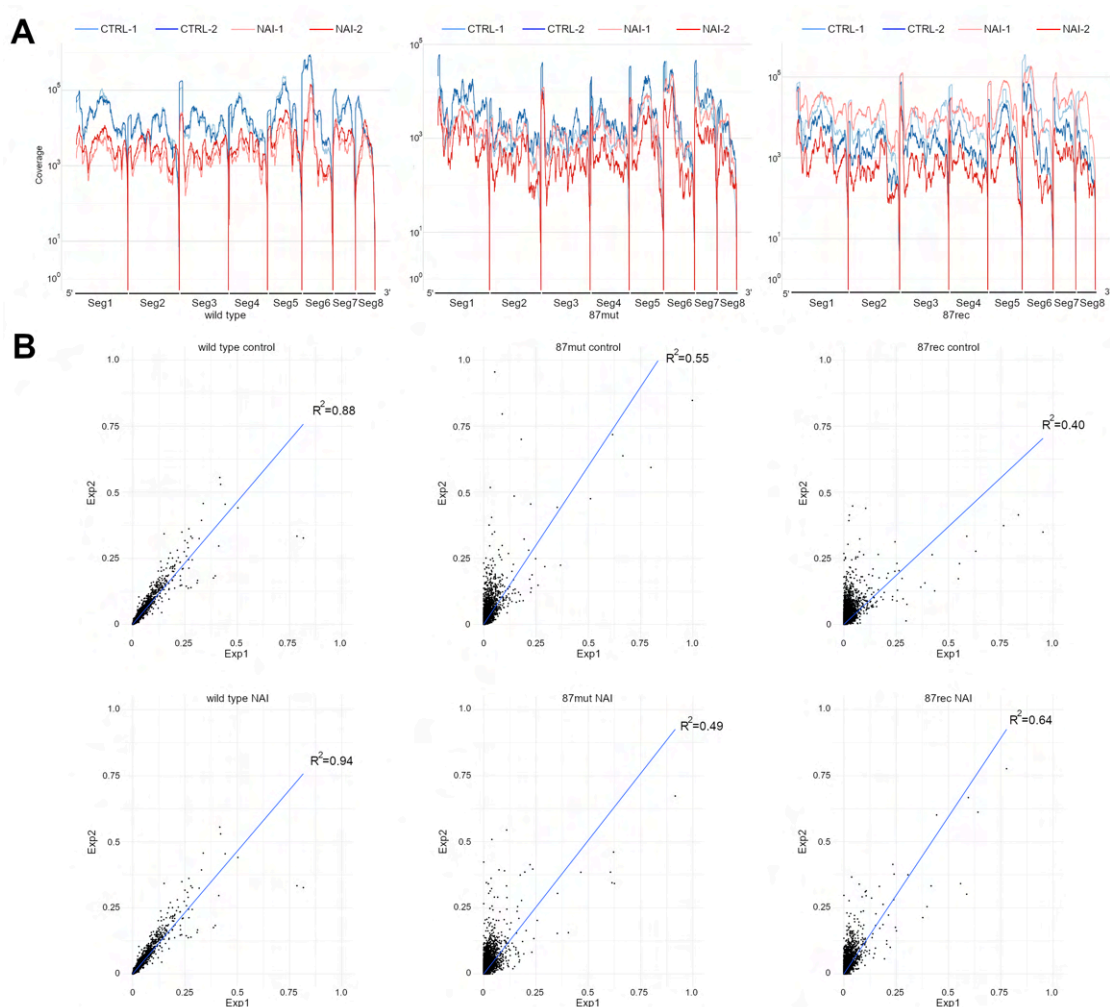

1  
2 **Figure S5. Coverage and drop-off rate of duplicate SHAPE-seq of the wild type,**  
3 **87mut, and 87rec viruses.** (A) Coverage of SHAPE-seq of the wild type, 87mut, and  
4 87rec viruses. Coverages of mock-treated and NAI-treated samples of the wild type,  
5 87mut, and 87rec viruses were shown. (B) Scatter plot of drop-off rate from duplicate  
6 experiments. The drop-off rates of duplicate experiments are plotted. The blue line means  
7 a regression line derived from the probabilities of each nucleotide. The coefficient of  
8 determination ( $R^2$ ) is shown in each graph.



1

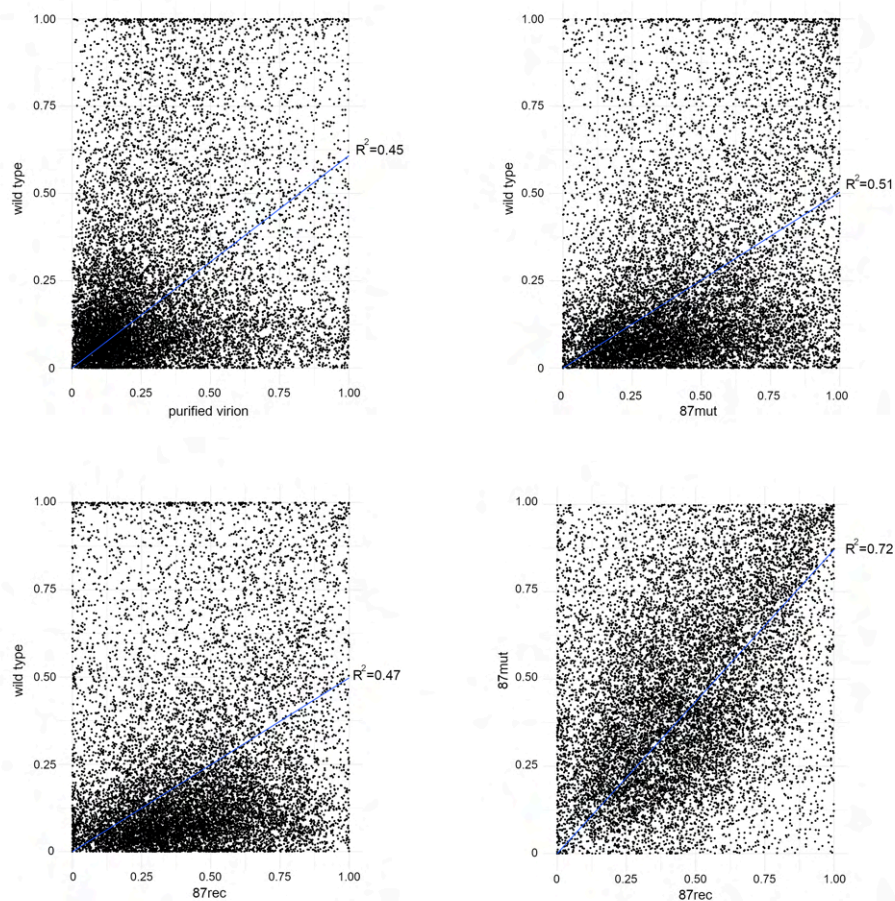

2

3 **Figure S6. Correlation analyses of probabilities between wild type and mutant**

4 **viruses.** Probability of each nucleotide position calculated from SHAPE-seq of purified

5 wild type virus from cell culture supernatant (wild type) and that from allantoic fluid

6 (allantoic fluid) (upper left), wild type virus and 87mut virus (upper right), wild type virus

7 and 87rec virus (lower left), and 87mut virus and 87rec virus (lower right) are plotted.

- 1 The blue line means a regression line derived from the probabilities of each nucleotide.
- 2 The coefficient of determination ( $R^2$ ) is shown in each graph.
- 3

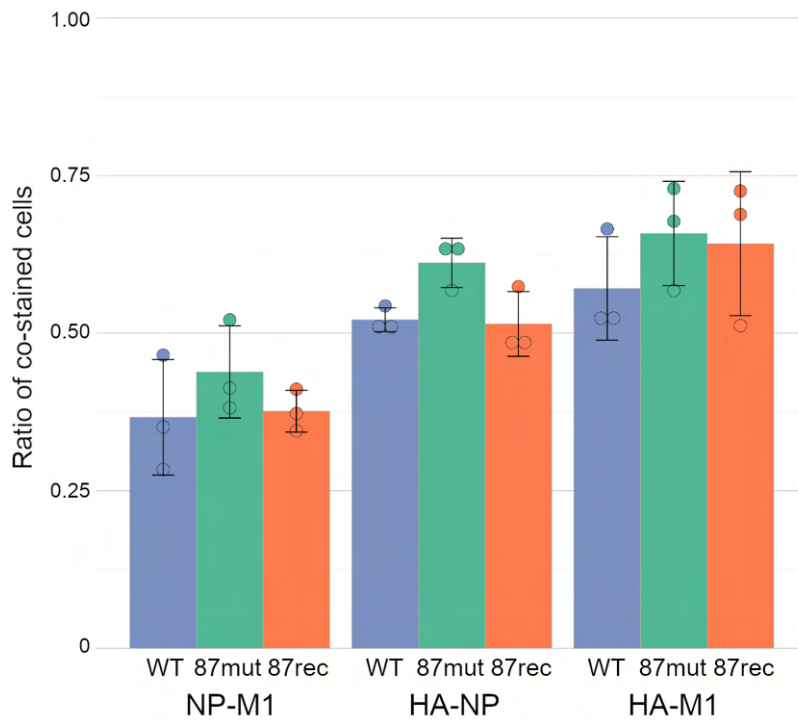

- 4
- 5 **Figure S7. Co-expression rate of two viral proteins in cells infected with the wild**
- 6 **type, 87mut, or 87rec virus.** The ratio of the co-stained cells was determined by FACS.
- 7 The graph indicates average values with standard deviations from three independent
- 8 experiments. The circles indicate the ratio of each experiment.
- 9

RNA crosslink method for Flu virion (modified LIGR-seq method)

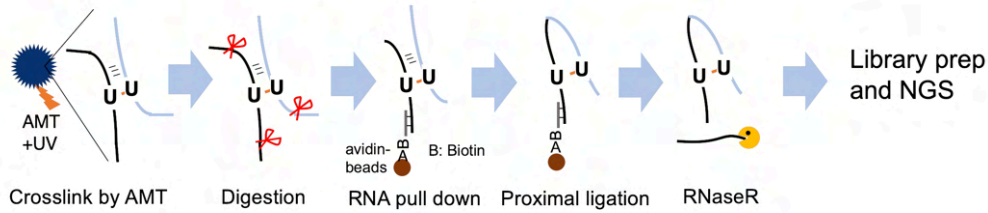

1

2 **Figure S8. Schematic representation of the methods for the identification of intra-**

3 **and intersegment interactions by modified LIGR-seq method.** Purified virion was

4 treated with AMT to cross-link between RNAs. After partial RNA digestion, vRNA was

5 purified by a biotin-conjugated antisense single-strand DNA, and proximal ligation was

6 performed.

7

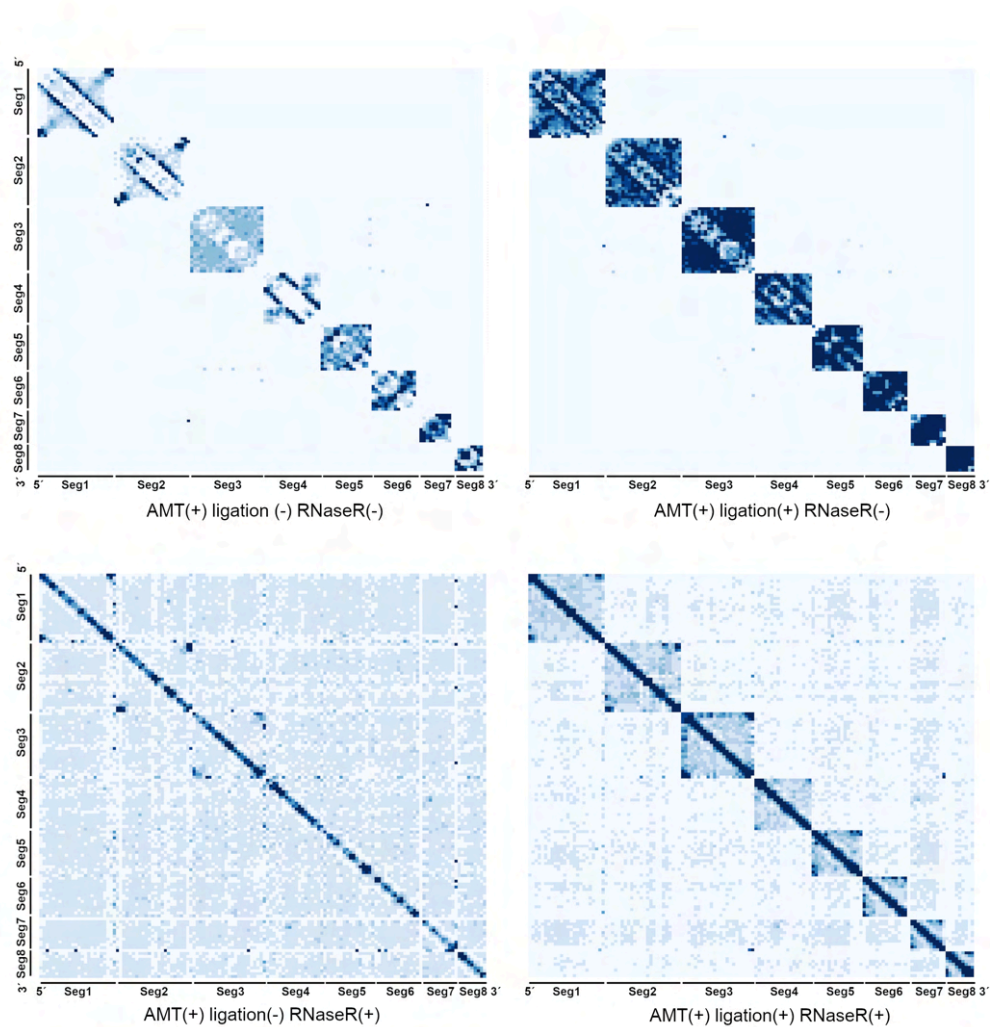

1

2 **Figure S9. Control experiments of LIGR-seq.** The normalized contact score matrix of

3 control experiments of LIGR-seq was shown.

4

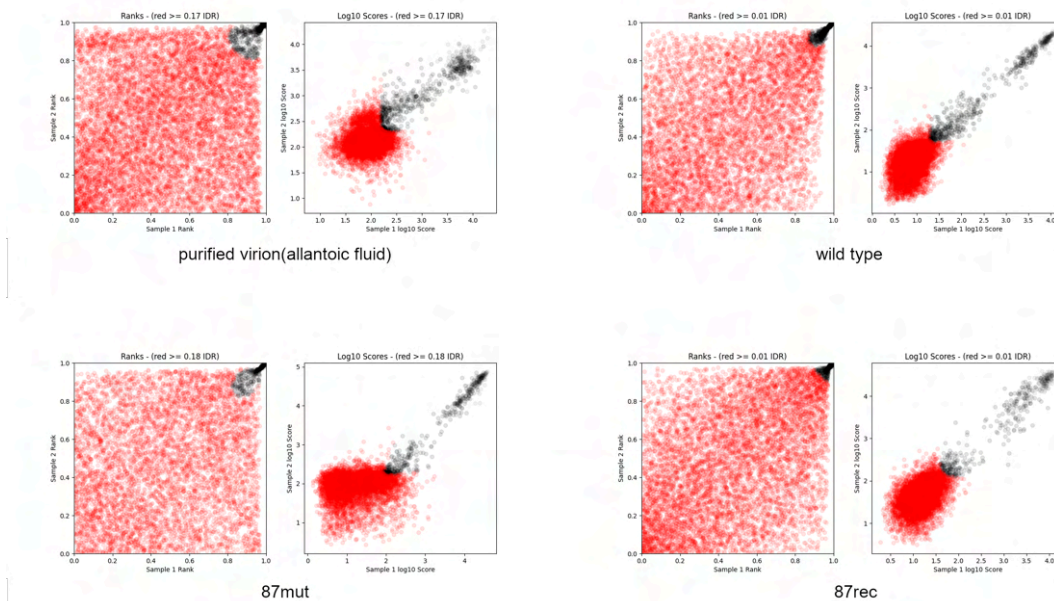

1

2 **Figure S10. Reproducibility of LIGR-seq and identification of intersegment**

3 **interactions with IDR scores from the top to the 100th.** Duplicate LIGR-seq results

4 from wild type (purified virion from allantoic fluid or cell culture supernatant), 87mut,

5 and 87rec viruses were analyzed by IDR. Rank and log10 score of normalized contact

6 score of each sample were plotted. The red circle in the purified virion from allantoic

7 fluid, wild type, 87mut, 87rec virus panels indicates a region that IDR score is higher than

8 threshold IDR score, and the black circle indicates a region that IDR score is lower than

9 threshold IDR score. Threshold IDR score was determined by the IDR score of the 100th

10 intersegment interaction and those of purified virion from allantoic fluid, wild type,

11 87mut, and 87rec viruses was 0.17, 0.01, 0.18, and 0.01, respectively. Red and black

12 circles contain both intrasegment and intersegment interaction regions.

13

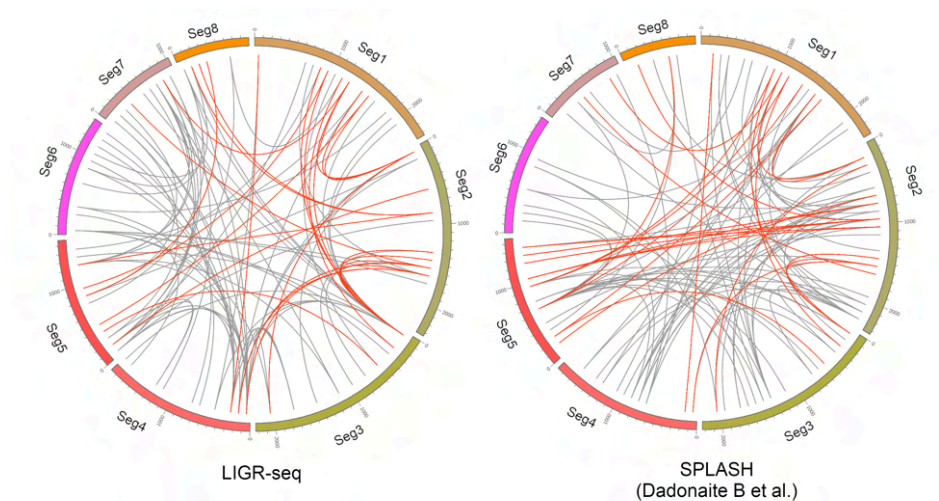

1

2 **Figure S11. Comparison of the intersegment interactions identified by LIGR-seq**

3 **with those by SPLASH.** The intersegment interaction map of 100 interactions from

4 LIGR-seq (left panel) and SPLASH (Dadonaite et al., 2019) (right panel). Intersegment

5 interactions identified in both LIGR-seq and SPLASH within 200 nt were indicated by

6 red lines.

7

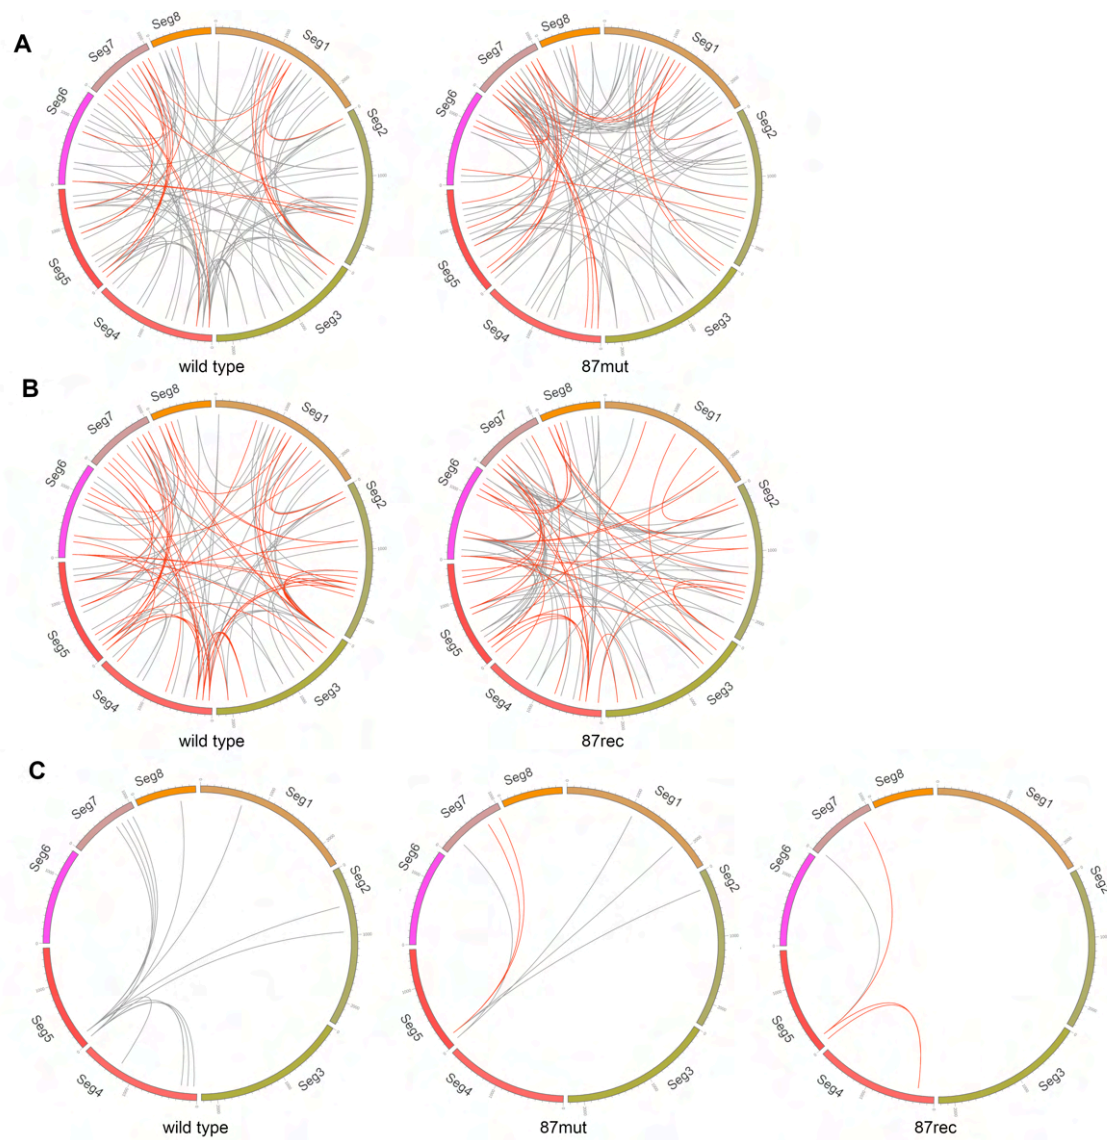

1

2 **Figure S12. Comparison of the intersegment interactions among wild type, 87mut,**

3 **and 87rec viruses. (A and B) Intersegment interactions between the wild type and 87mut**

4 **(A) and wild type and 87rec viruses (B). Intersegment interaction maps of the wild type**

5 **and 87mut virus (A) or the wild type and 87rec virus (B) were constructed from LIGR-**

6 **seq. Intersegment interactions identified in both the wild type and the 87mut virus or the**

7 **87rec virus within a limit of 200 nt have been indicated by red lines. (C) The intersegment**

8 **interactions between segment 5 and other segments in wild type, 87mut, and 87rec viruses.**

1 Intersegment interactions identified in both wild type virus and 87mut or 87rec viruses  
 2 within 200 nt were indicated by red lines. Arrow indicates nucleotide positions 87-130 of  
 3 segment 5 that form a pseudoknot structure.

4

5 **Table S1. High-NP-binding regions from PAR-CLIP data sets**

| Segment | From (nt) | To (nt) | Segment | From (nt) | To (nt) |
|---------|-----------|---------|---------|-----------|---------|
| Seg1    | 973       | 987     | Seg5    | 518       | 526     |
| Seg1    | 1298      | 1316    | Seg5    | 778       | 803     |
| Seg1    | 1856      | 1868    | Seg5    | 825       | 839     |
| Seg1    | 2191      | 2223    | Seg5    | 902       | 915     |
| Seg2    | 195       | 229     | Seg5    | 972       | 991     |
| Seg2    | 301       | 332     | Seg5    | 1077      | 1085    |
| Seg2    | 356       | 380     | Seg6    | 388       | 404     |
| Seg2    | 490       | 514     | Seg6    | 660       | 679     |
| Seg2    | 672       | 700     | Seg6    | 846       | 858     |
| Seg2    | 2280      | 2301    | Seg6    | 1271      | 1291    |
| Seg3    | 230       | 239     | Seg7    | 292       | 307     |
| Seg3    | 392       | 420     | Seg7    | 402       | 426     |
| Seg3    | 1463      | 1482    | Seg7    | 648       | 672     |
| Seg4    | 211       | 230     | Seg7    | 934       | 960     |
| Seg4    | 583       | 610     | Seg8    | 147       | 158     |
| Seg4    | 764       | 775     | Seg8    | 206       | 240     |
| Seg4    | 780       | 789     | Seg8    | 659       | 685     |
| Seg4    | 884       | 912     |         |           |         |
| Seg4    | 1648      | 1671    |         |           |         |

6 vRNA nucleotides with fold-change >2 were identified and these areas represent high-  
 7 NP-binding regions. High-NP-binding regions  $\geq 9$  nt were listed and subjected to RNA  
 8 structure analysis using SHAPE-seq and DMS-seq results.

9



1

2 **Table S2. Probabilities of high-NP-binding regions**

| SHAPE-seq  | Total (13308 nt) | High-NP region (761 nt) | Without high-NP region (12547 nt) | p-value*               |
|------------|------------------|-------------------------|-----------------------------------|------------------------|
| virion NAI | 0.255            | 0.322                   | 0.251                             | 3.24x10 <sup>-10</sup> |
| vRNP NAI   | 0.251            | 0.287                   | 0.249                             | 3.53x10 <sup>-4</sup>  |
| vRNA NAI   | 0.450            | 0.435                   | 0.451                             | 1.05x10 <sup>-5</sup>  |
| DMS-seq    | Total (6394 nt)  | High-NP region (322 nt) | Without high-NP region (6072 nt)  |                        |
| virion DMS | 0.270            | 0.257                   | 0.271                             | 4.02x10 <sup>-1</sup>  |
| vRNP DMS   | 0.329            | 0.305                   | 0.330                             | 1.91x10 <sup>-1</sup>  |
| vRNA DMS   | 0.213            | 0.179                   | 0.215                             | 1.10x10 <sup>-3</sup>  |

3 \* Wilcoxon rank sum test between high-NP regions and total without high-NP regions.

4

5

6 **Table S3. Intrasegment and intersegment mapped reads in LIGR-seq experiments.**

|                      | Intrasegment reads | Intersegment reads |            | Intrasegment reads | Intersegment reads |
|----------------------|--------------------|--------------------|------------|--------------------|--------------------|
| Purified virion rep1 | 1,808,107          | 1,181,973          | 87mut rep1 | 7,568,862          | 325,922            |
| Purified virion rep2 | 2,364,282          | 1,108,214          | 87mut rep2 | 13,930,768         | 1,071,807          |
| Wild type rep1       | 2,082,523          | 63,177             | 87rec rep1 | 7,910,639          | 697,873            |
| Wild type rep2       | 3,688,080          | 151,199            | 87rec rep2 | 2,380,329          | 167,907            |

7

8

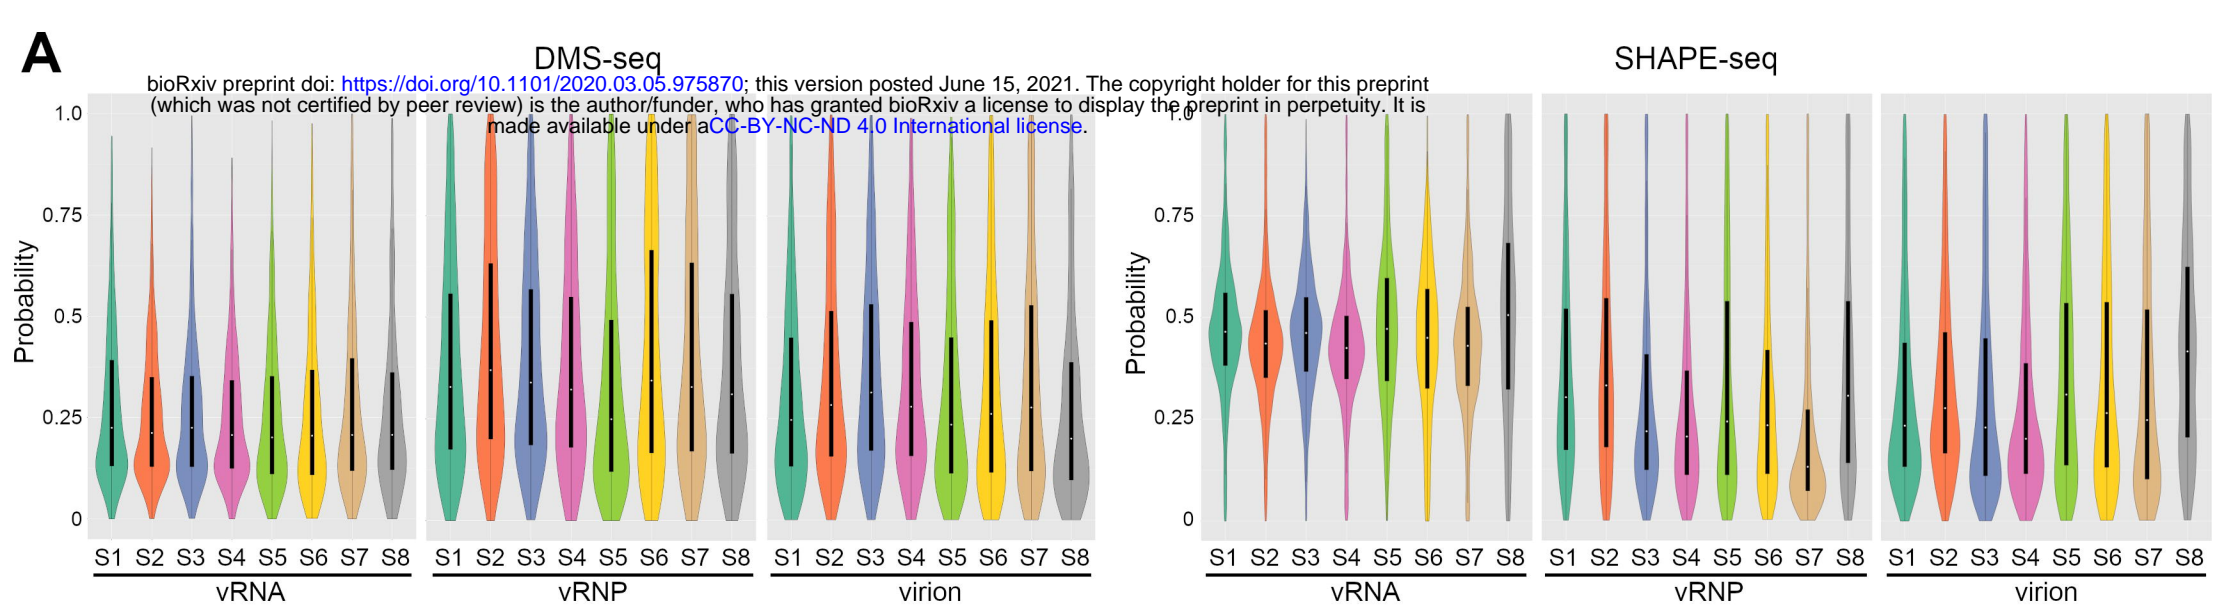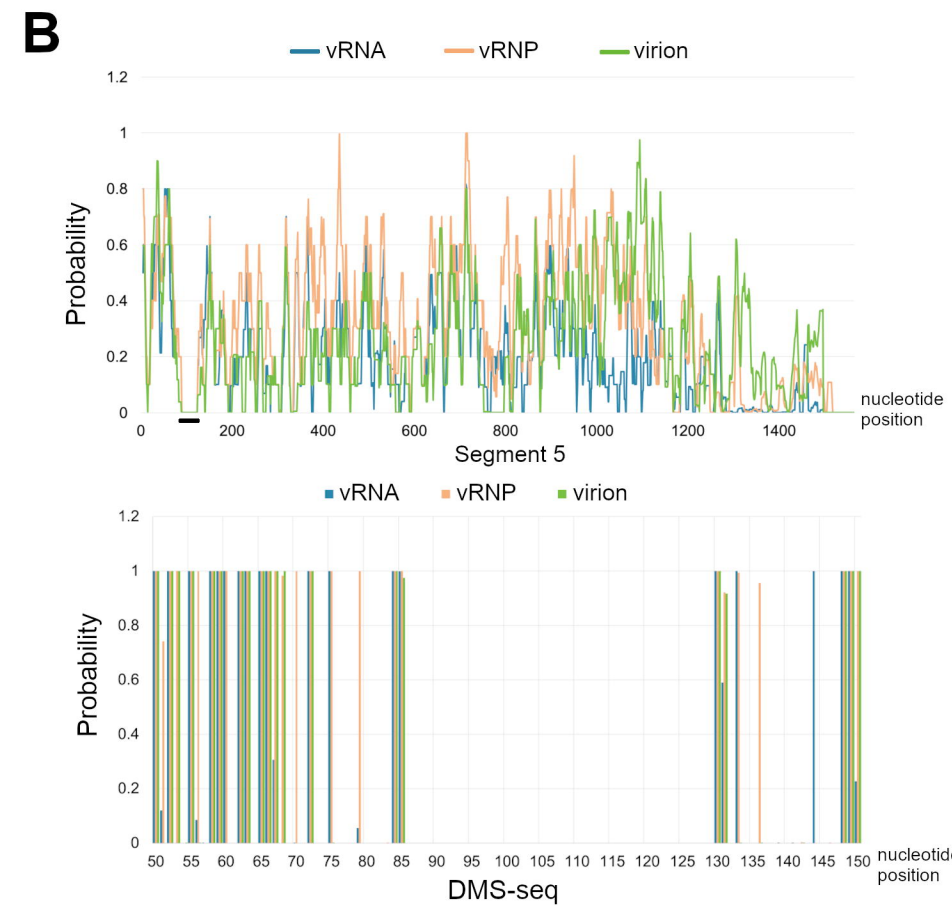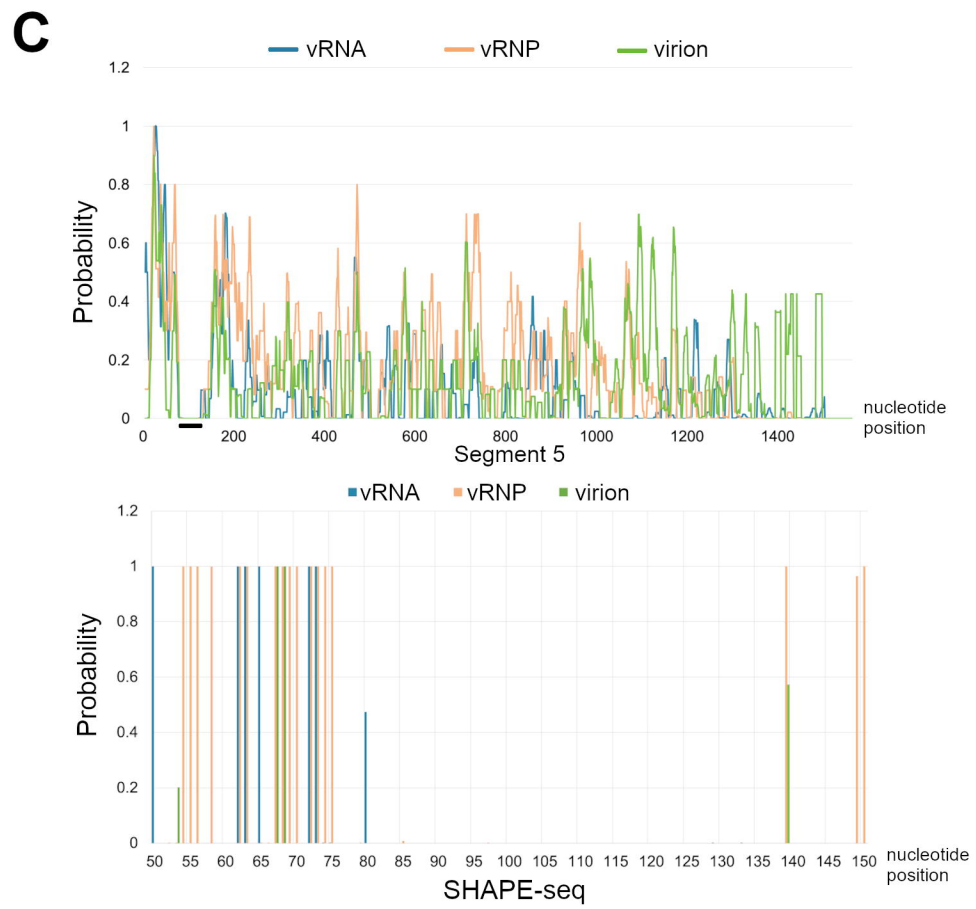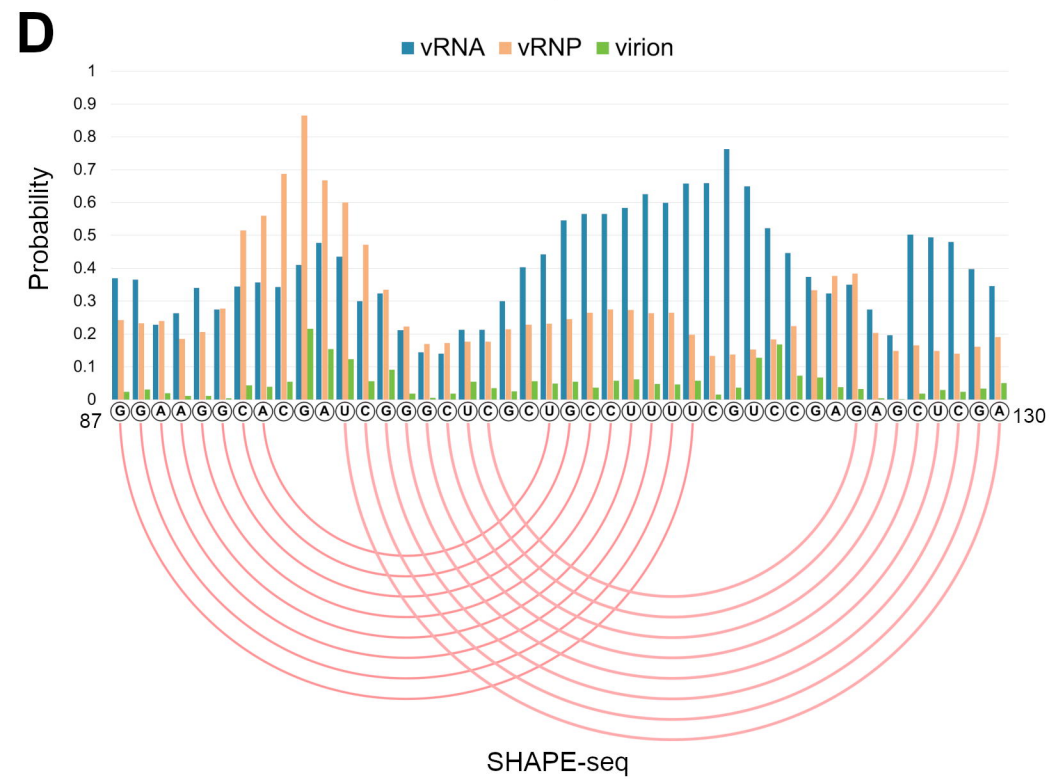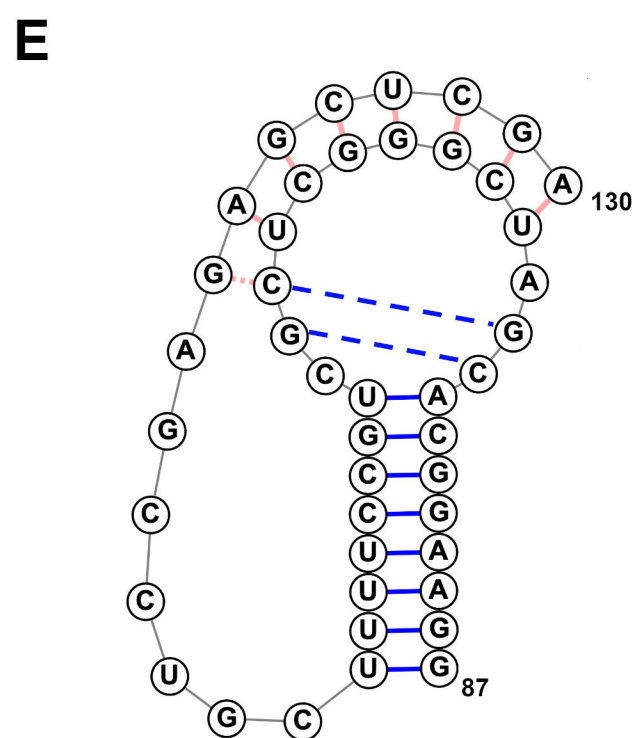

**A**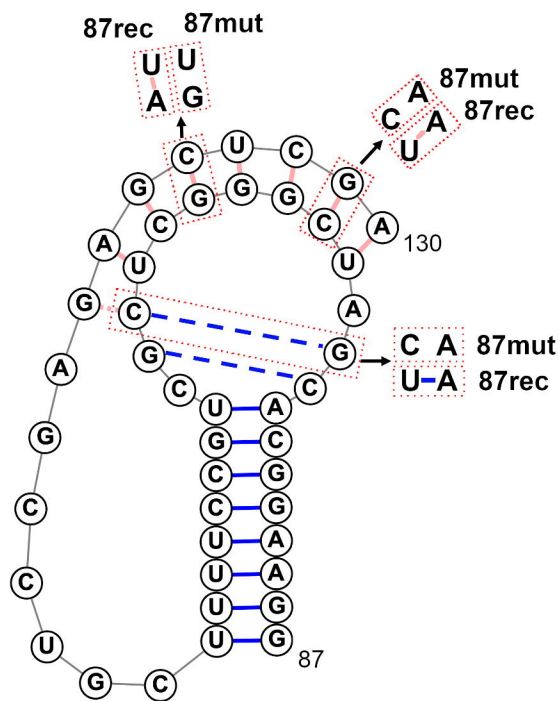**B**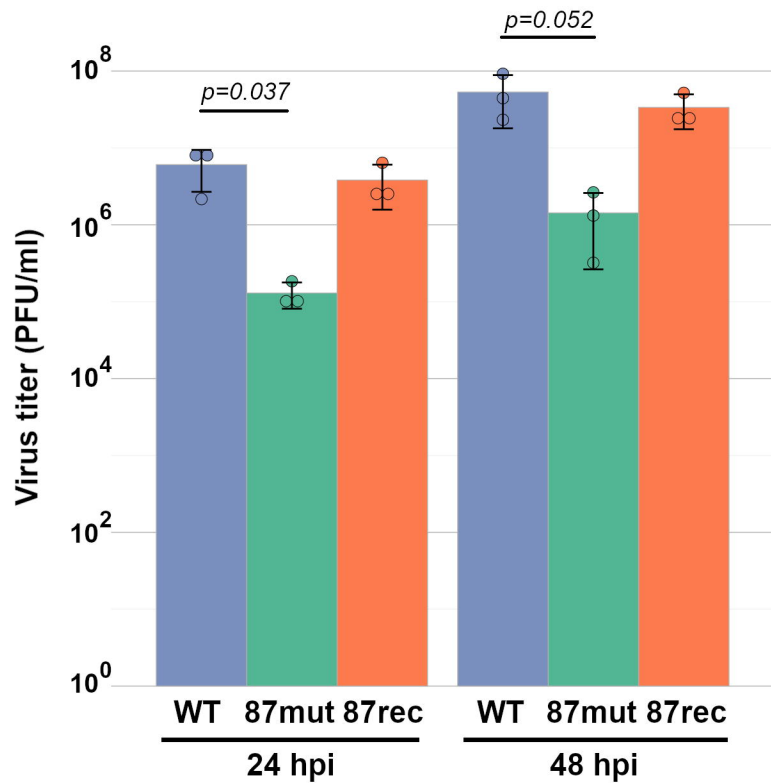

**A**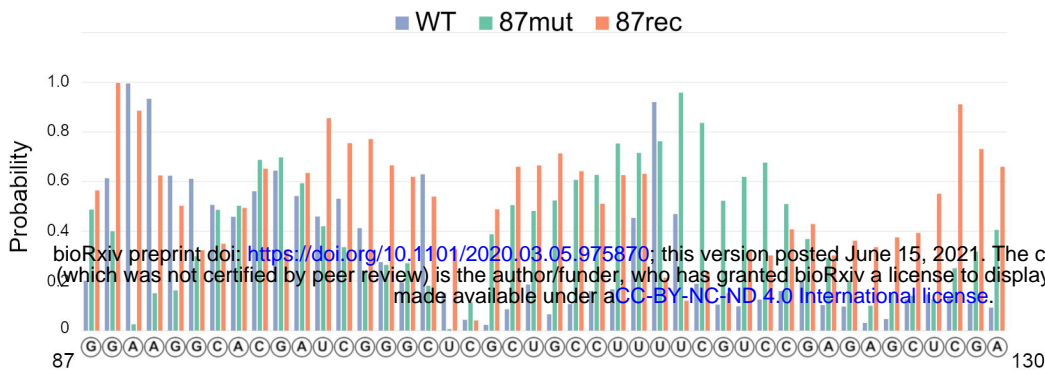**B**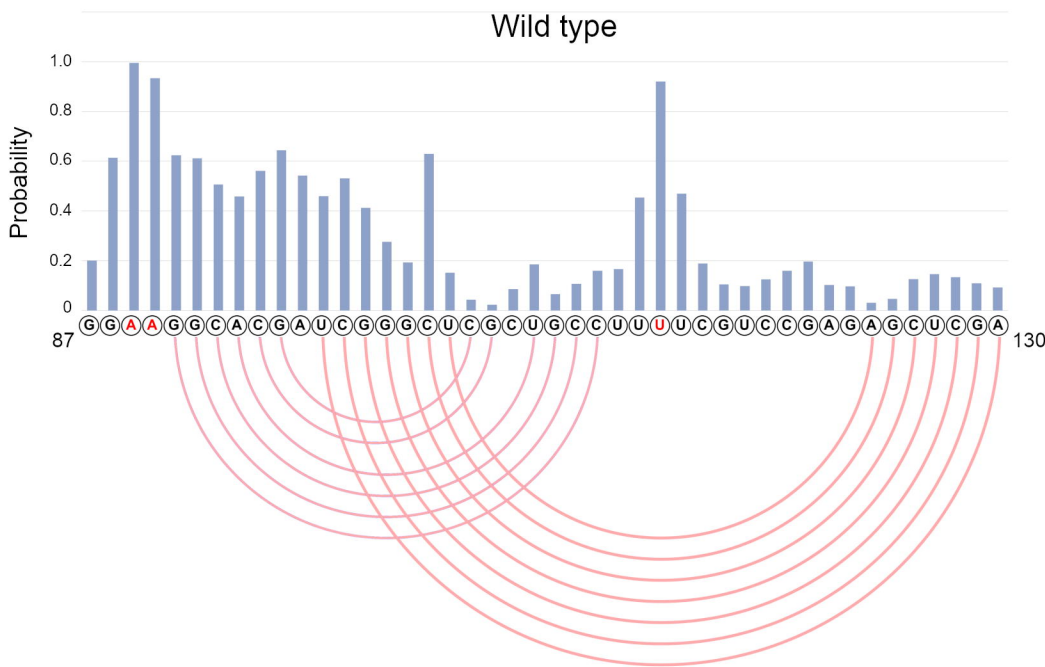**C**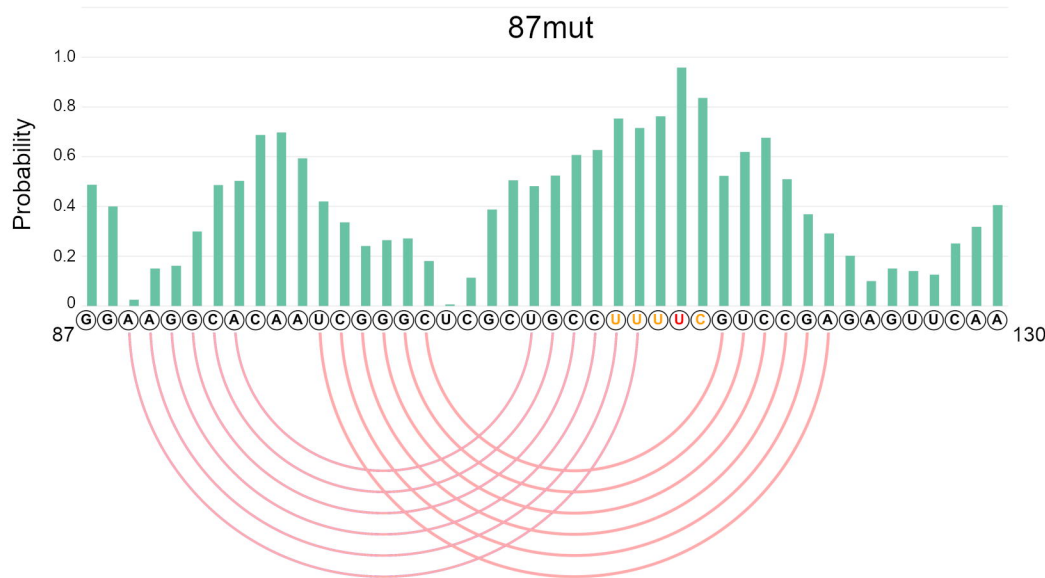**D**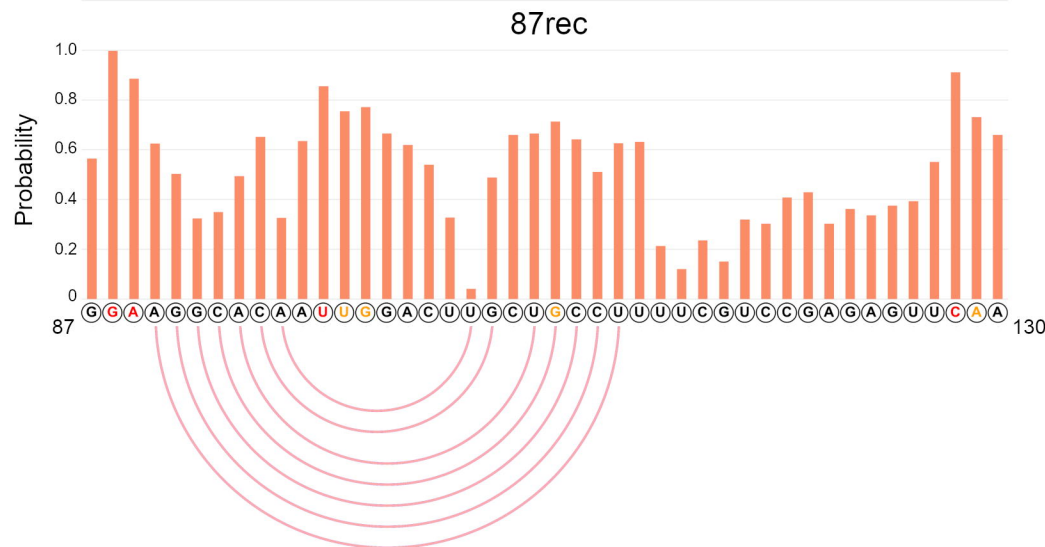

**A**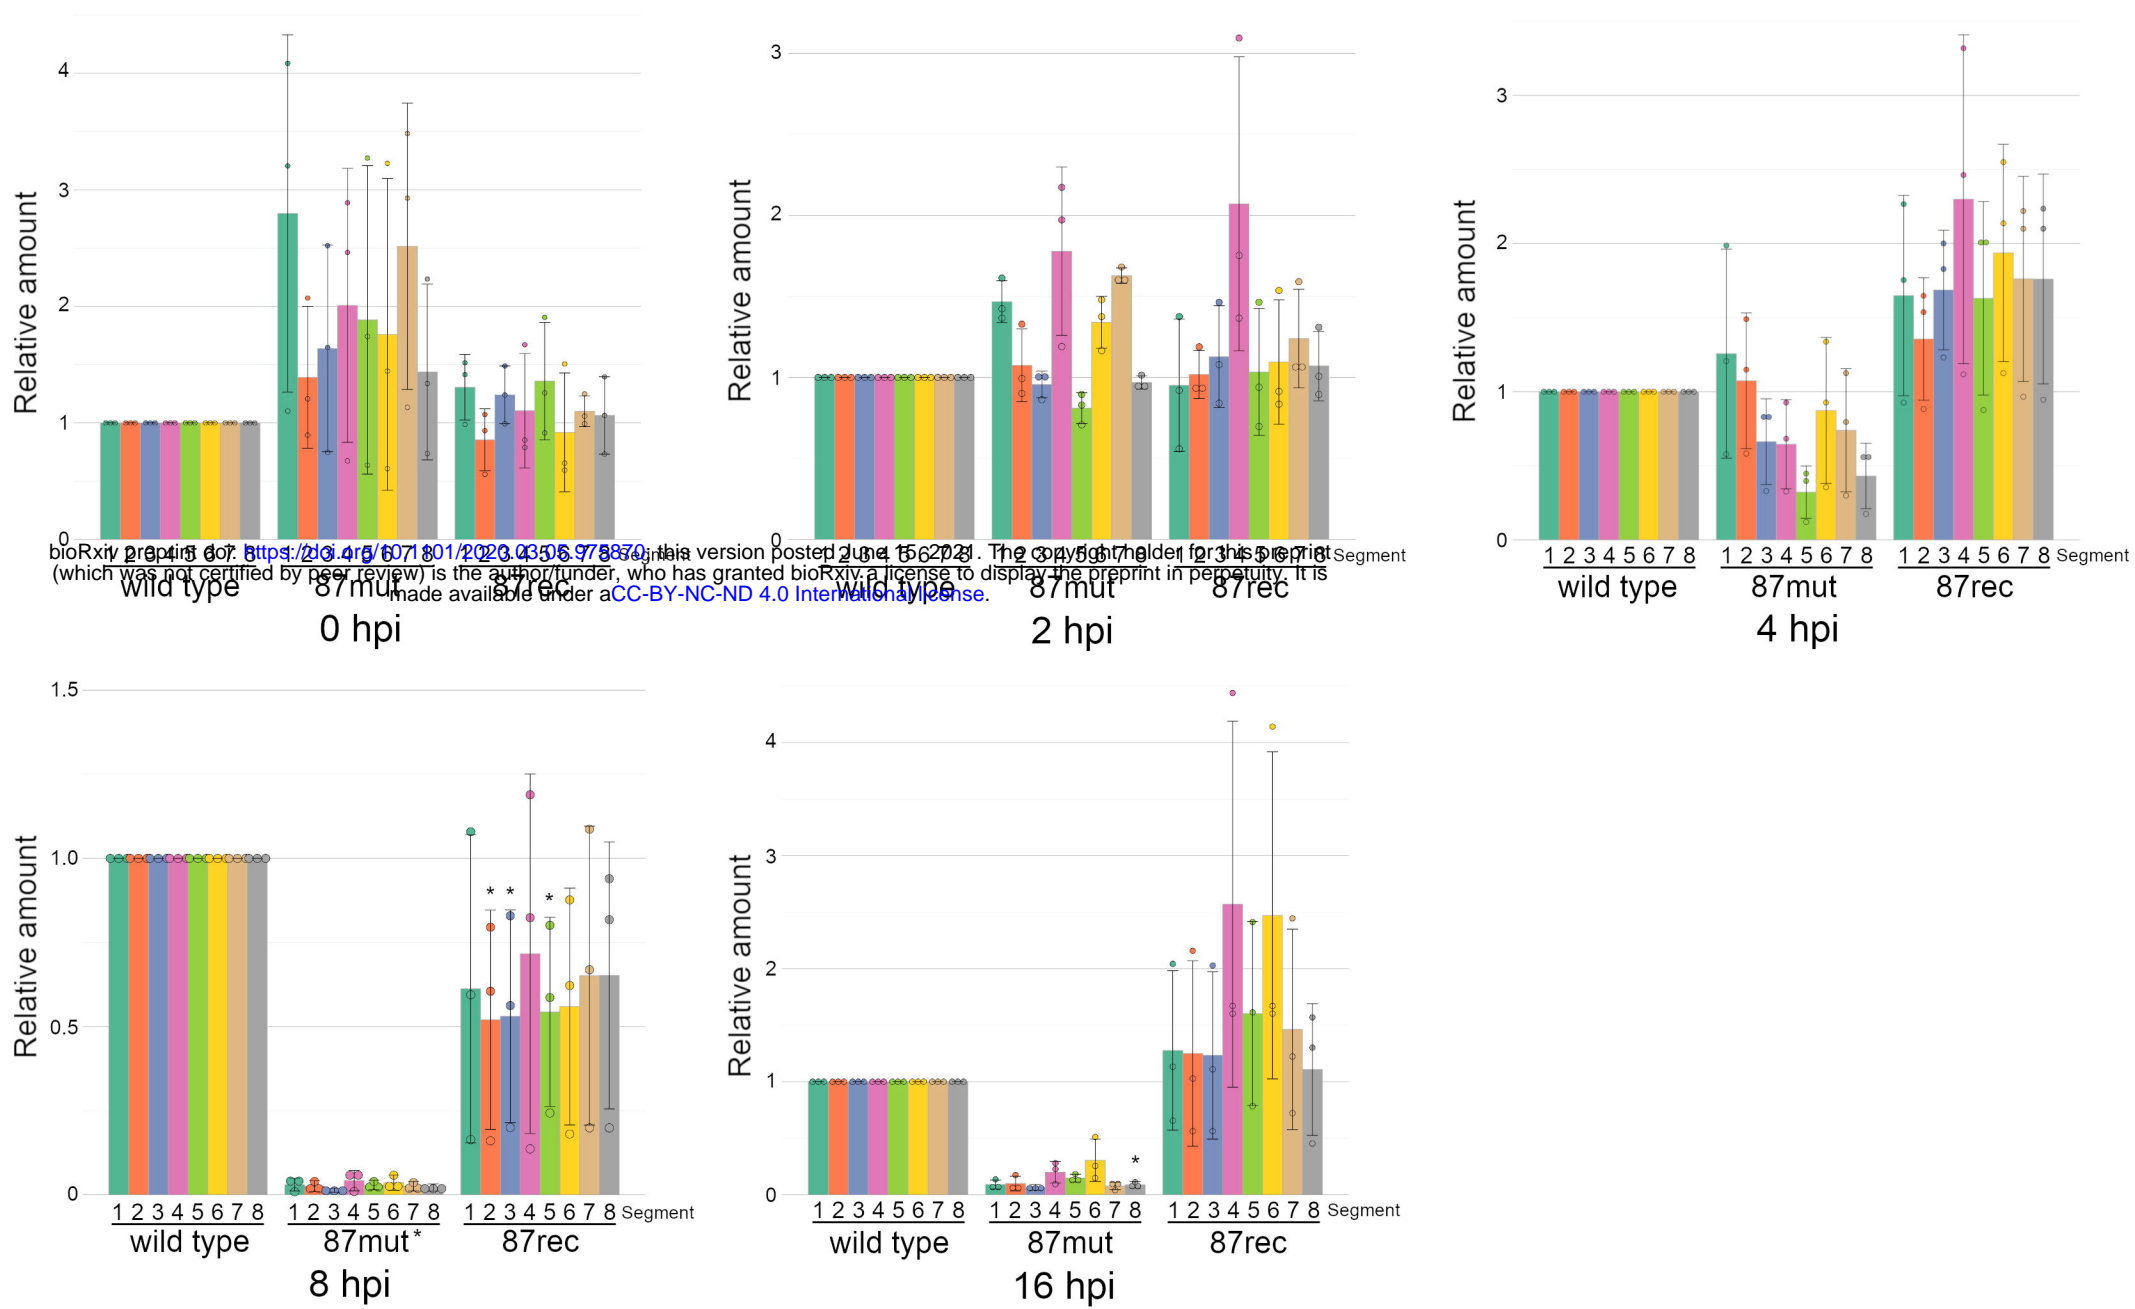**B**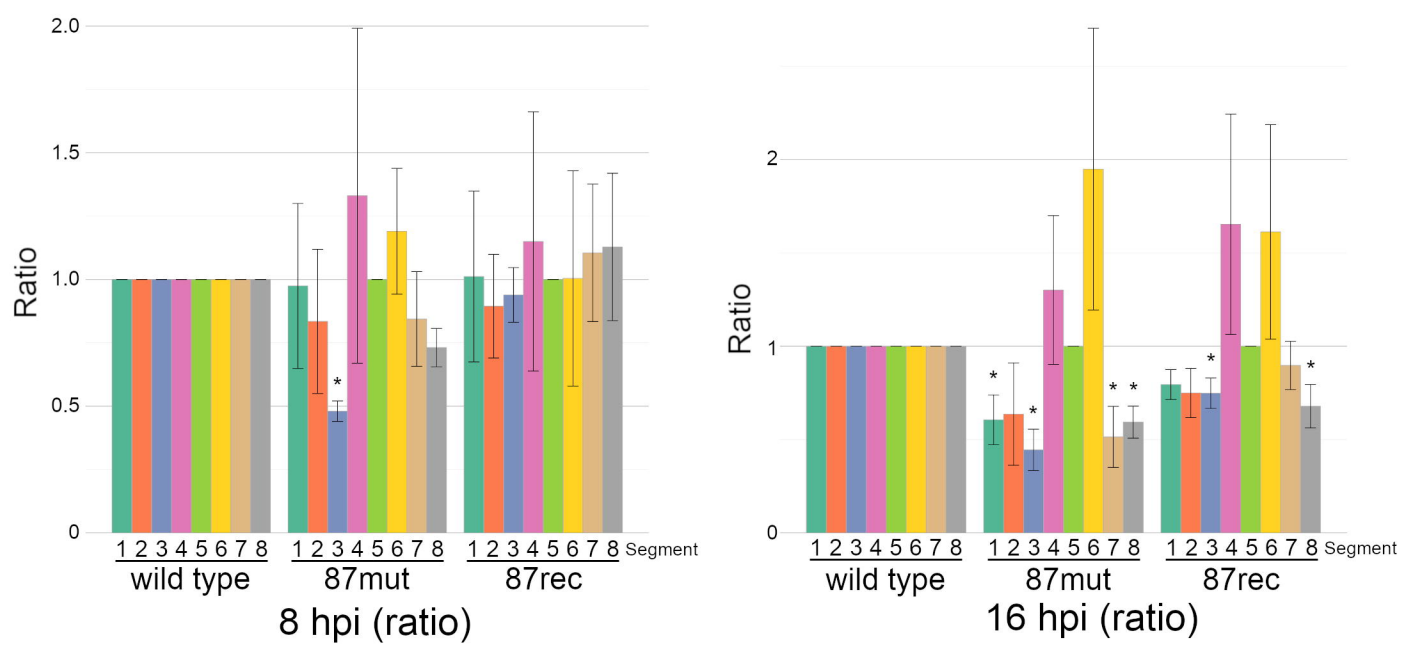**C**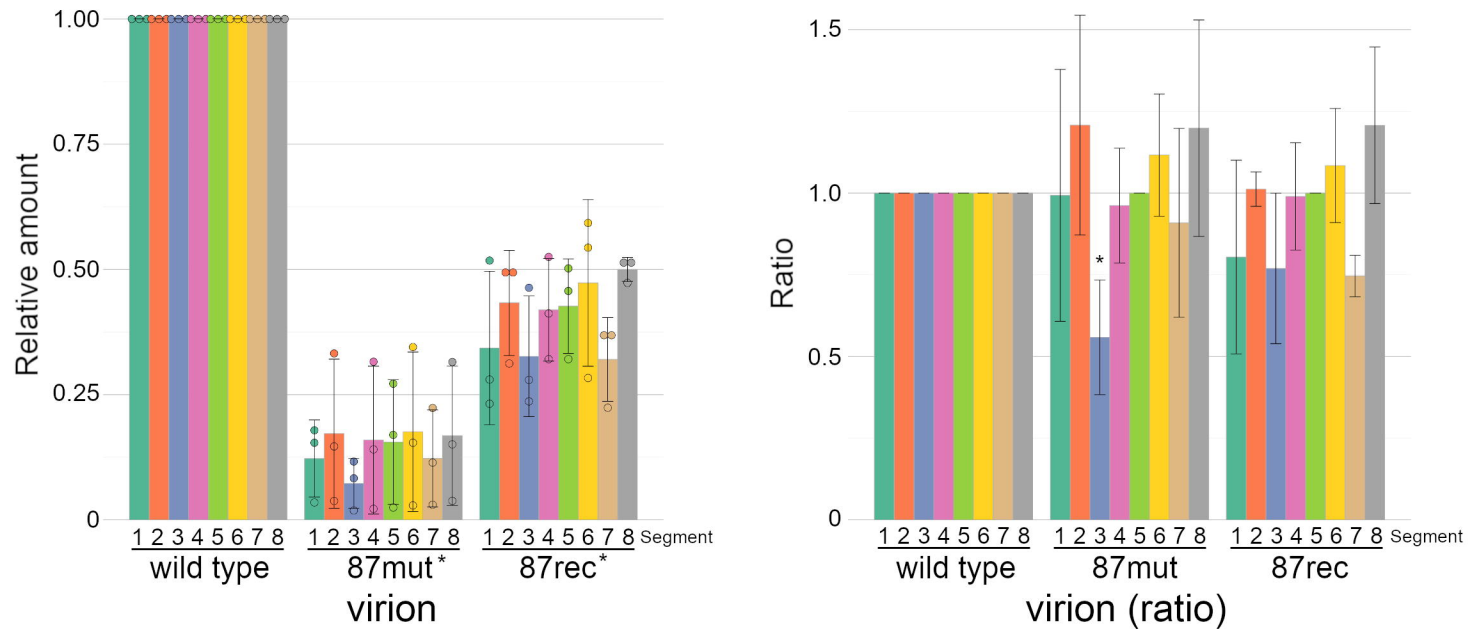

**A**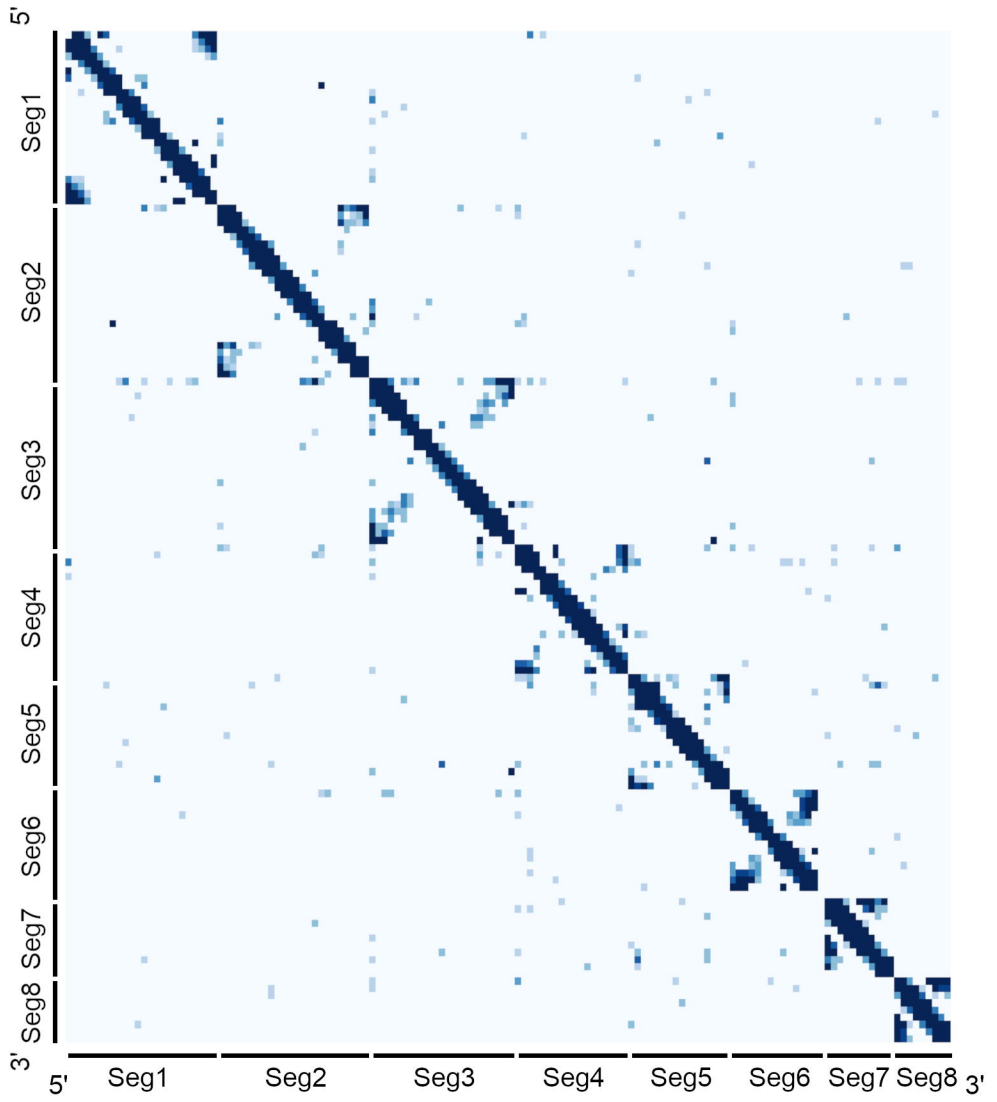**B**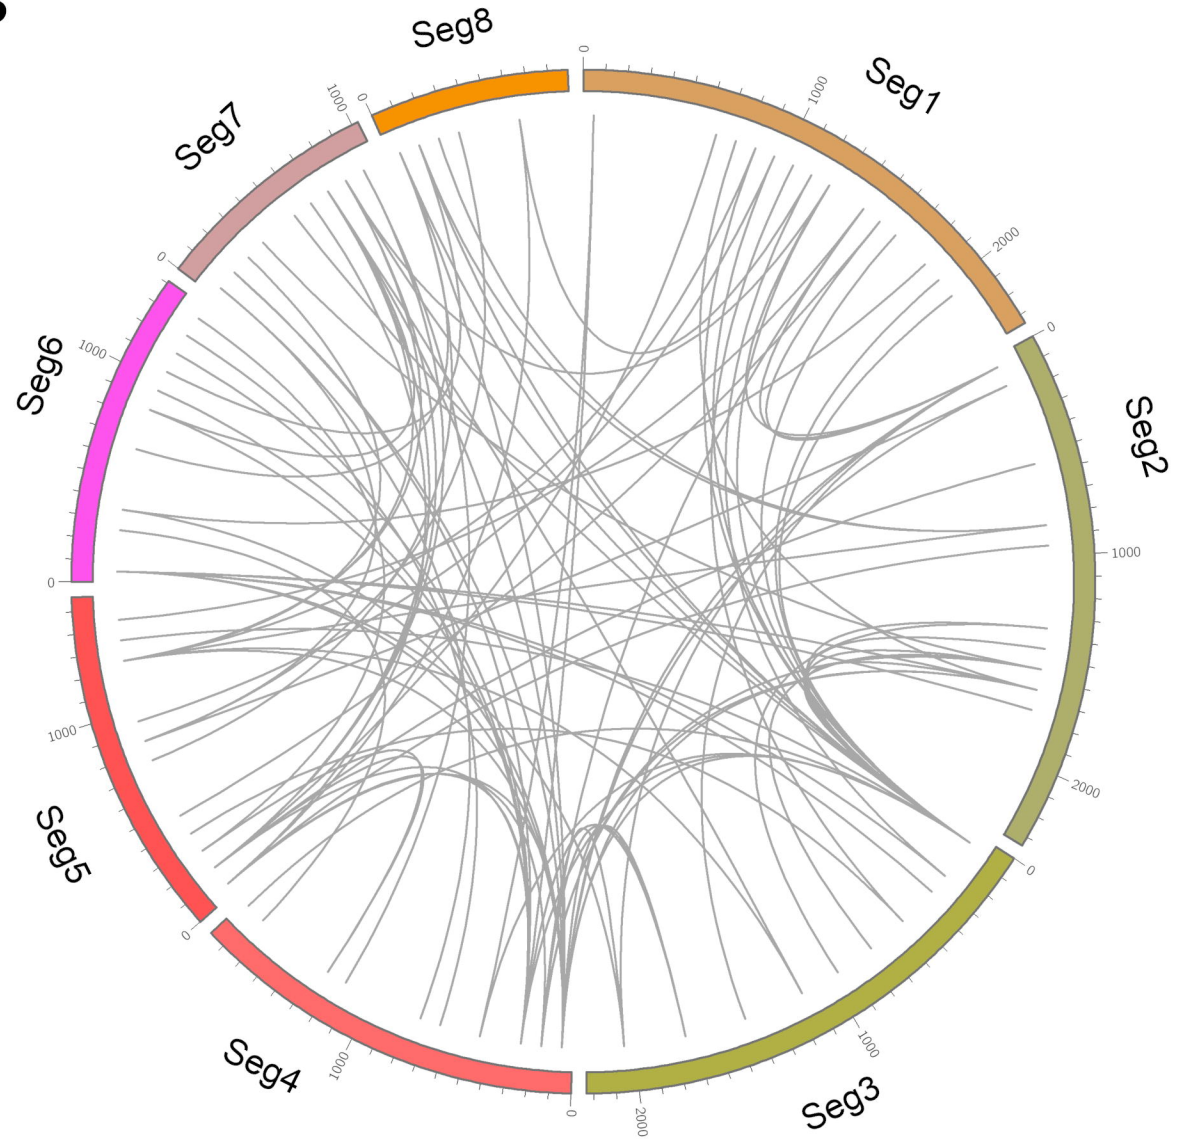

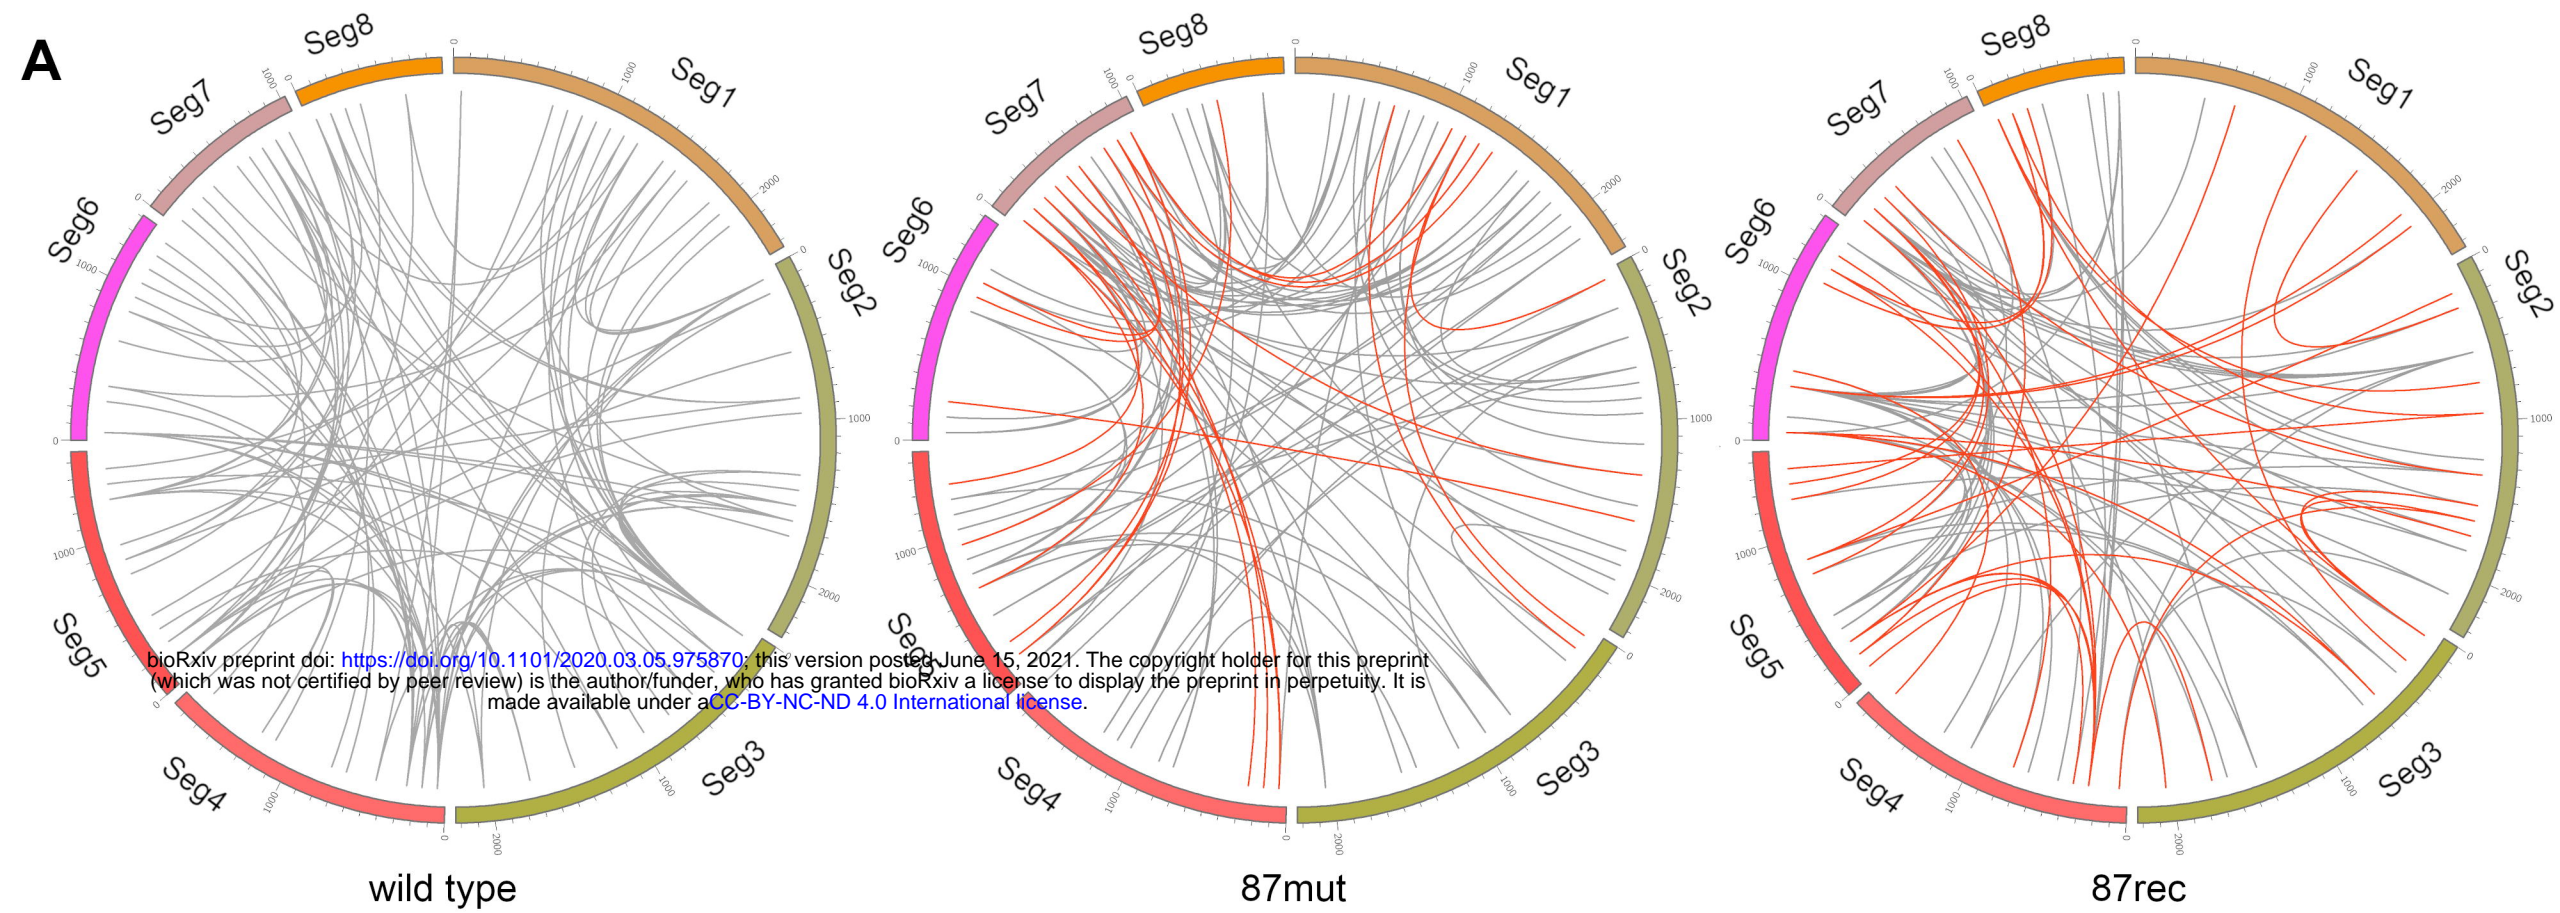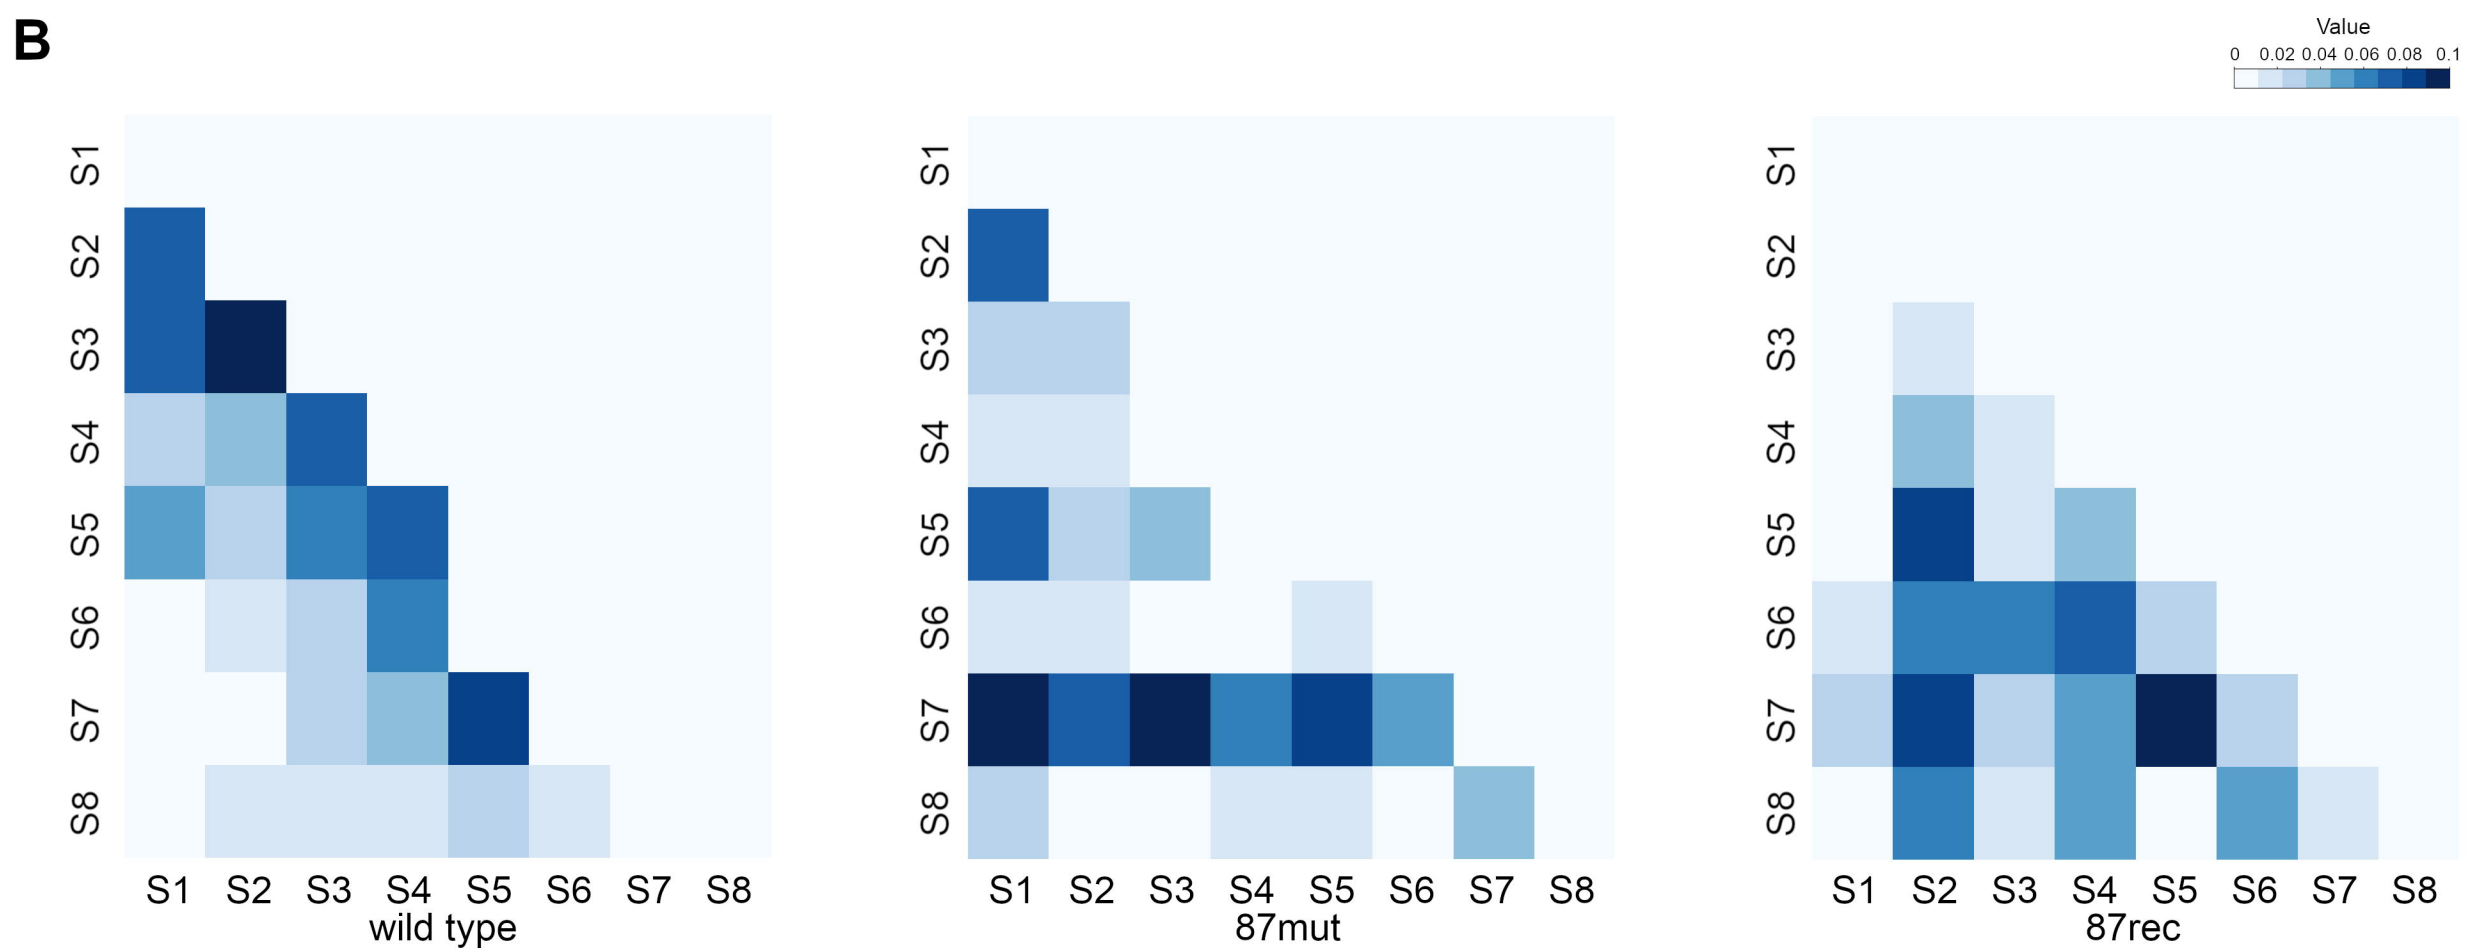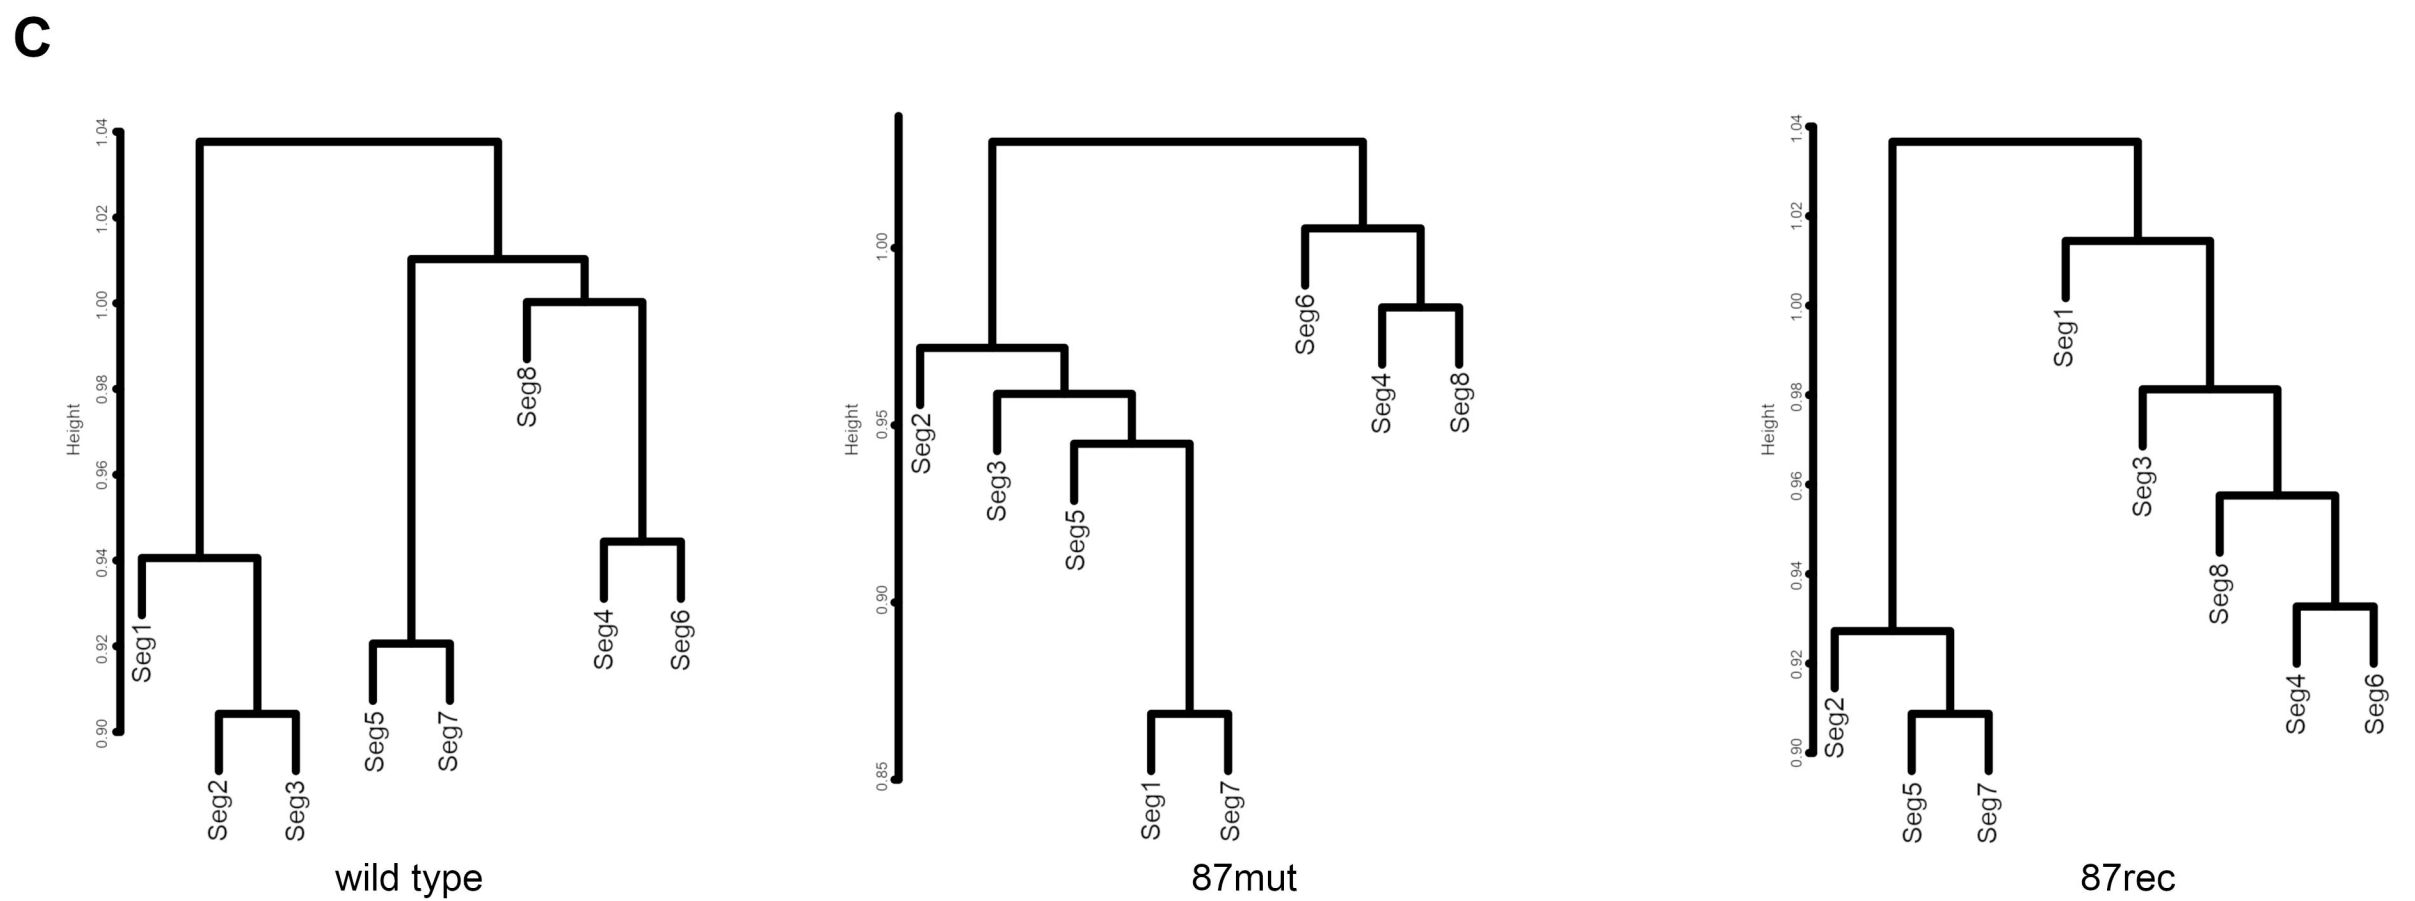

Source: https://www.biorxiv.org/content/biorxiv/early/2021/06/15/2020.03.05.975870.full.pdf
